# Supplementary material for: Bioavailability of Orally Administered Drugs in Critically Ill Patients
Source: PubMed Central journal article supplement — J Pharm Pract. 2022 May 6;36(4):967–79. doi: 10.1177/08971900221100205 (PMC10350721; doi:10.1177/08971900221100205), 2022-05-06
Supplement: sj-pdf-1-jpp-10.1177_08971900221100205.pdf [file sj-pdf-1-jpp-10.1177_08971900221100205.pdf]

### Bioavailability of Orally Administered Drugs in Critically Ill Patients

**Supplementary Table 1.** Summarizing table of all articles discussing altered drug absorption in adults.

| Author, year                      | Study type                  | Drug and dose                                                            | Study population                                                                                                                                                                                        | N                                      | Sex (% Male)                         | Age (years)                                                 | F (%) | AUC | C                                                                                                                                                                                                                                | Factors altering drug absorption                                                             | Main findings and clinical considerations                                                                                                                                                                                                                                          |
|-----------------------------------|-----------------------------|--------------------------------------------------------------------------|---------------------------------------------------------------------------------------------------------------------------------------------------------------------------------------------------------|----------------------------------------|--------------------------------------|-------------------------------------------------------------|-------|-----|----------------------------------------------------------------------------------------------------------------------------------------------------------------------------------------------------------------------------------|----------------------------------------------------------------------------------------------|------------------------------------------------------------------------------------------------------------------------------------------------------------------------------------------------------------------------------------------------------------------------------------|
| <b>ANTICONVULSANTS</b>            |                             |                                                                          |                                                                                                                                                                                                         |                                        |                                      |                                                             |       |     |                                                                                                                                                                                                                                  |                                                                                              |                                                                                                                                                                                                                                                                                    |
| Bauer <sup>1</sup> , 1982         | Prospective observational   | Phenytoin<br>A: 1000 mg loading dose followed by 300 mg<br><br>B: 400 mg | Neurosurgery patients<br>Groups<br><br>A1: phenytoin treatment for 14 days. TF was discontinued on day 8<br><br>A2: phenytoin treatment for 14 days. TF was started on day 8<br><br>B: healthy subjects | 25<br>A1: 10<br><br>A2: 10<br><br>B: 5 | A.1: 80<br><br>A.2: 70<br><br>B: 100 | A.1: 25.3 ± 4.7<br><br>A.2: 27.6 ± 5.3<br><br>B: 23.2 ± 3.1 | NR    | NR  | Initial (µg/ml):<br><br>A.1, day 8: 2.59 ± 0.96<br><br>A.1, day 14: 10.22 ± 2.90<br><br>A.2, day 8: 9.80 ± 3.27<br><br>A.2, day 14: 2.72 ± 1.09<br><br>B, TF: 0.70 ± 0.26 (after 24 h)<br><br>B, no TF: 3.40 ± 0.45 (after 24 h) | <ul style="list-style-type: none"> <li>Interactions with the TF formula (Isocal®)</li> </ul> | <ul style="list-style-type: none"> <li>Decreased concentrations in all groups when co-administered with TF*</li> <li>Concentrations (random) increased when TF was held for two h before and after drug administration</li> </ul>                                                  |
| Sneed et al. <sup>2</sup> , 1988  | Retrospective observational | Phenytoin                                                                | Brain-injured patients<br>Investigations with TF                                                                                                                                                        | 11                                     | NR                                   | NR                                                          | NR    | NR  | Exact numbers<br>NR                                                                                                                                                                                                              | <ul style="list-style-type: none"> <li>Interactions with the TF formula</li> </ul>           | <ul style="list-style-type: none"> <li>Seven patients had altered serum phenytoin levels due to TF. All needed higher doses to maintain desirable drug concentrations. Six of these showed a rise when TF was held*</li> <li>TDM is important in this population</li> </ul>        |
| Faraji et al. <sup>3</sup> , 1998 | Retrospective observational | Phenytoin                                                                | Brain-injured patients<br>Groups<br>A: TF was held for 1 h after drug administration<br>B: continuous TF                                                                                                | 22<br>A: 13<br><br>B: 9                | 91                                   | 36 (16-65)                                                  | NR    | NR  | Mean (µg/ml):<br><br>A: 14.4 ± 4.7<br><br>B: 9.2 ± 6.8                                                                                                                                                                           | <ul style="list-style-type: none"> <li>Interactions with the TF formula</li> </ul>           | <ul style="list-style-type: none"> <li>Higher concentrations in group A*</li> <li>No difference in means for dose mg/24h or dose mg/kg between the groups*</li> <li>Similar results after adjusting for serum albumin level</li> <li>No difference in mean intake of TF</li> </ul> |

| Author, year                                    | Study type                 | Drug and dose                                                                                                                  | Study population                                                                                                                                                                                                                                                                                                                    | N                    | Sex (% Male)   | Age (years)                    | F (%) | AUC | C                                                                                                                        | Factors altering drug absorption                                                                                                                                                                                                                                                                                  | Main findings and clinical considerations                                                                                                                                                                                                   |
|-------------------------------------------------|----------------------------|--------------------------------------------------------------------------------------------------------------------------------|-------------------------------------------------------------------------------------------------------------------------------------------------------------------------------------------------------------------------------------------------------------------------------------------------------------------------------------|----------------------|----------------|--------------------------------|-------|-----|--------------------------------------------------------------------------------------------------------------------------|-------------------------------------------------------------------------------------------------------------------------------------------------------------------------------------------------------------------------------------------------------------------------------------------------------------------|---------------------------------------------------------------------------------------------------------------------------------------------------------------------------------------------------------------------------------------------|
| Sohrevari et al. <sup>4</sup> , 2008            | Prospective interventional | Phenytoin<br>Steady-state dose, 300 mg QD                                                                                      | Patients with acute brain injury<br>Groups<br>A: continuous TF<br>B: TF was held for 2 h before drug administration                                                                                                                                                                                                                 | 30<br>A: 15<br>B: 15 | A: 60<br>B: 73 | A: 36.2 ± 15<br>B: 35.8 ± 13.9 | NR    | NR  | Steady state (µg/ml):<br><br>A: 6.3 ± 4<br><br>B: 24.7 ± 9.4                                                             | <ul style="list-style-type: none"> <li>Interactions with the TF formula</li> </ul>                                                                                                                                                                                                                                | <p>formula*</p> <ul style="list-style-type: none"> <li>Subtherapeutic levels in 70% of the patients in group A*</li> <li>Supratherapeutic levels in 70% of the patients in group B*</li> <li>TDM is important in this population</li> </ul> |
| Taylor et al. <sup>5</sup> , 1993 (letter)      | Case report                | Phenytoin<br>Day 3-14: 368 mg/d phenytoin base<br><br>Day 15-39: 360 mg/d suspension<br><br>Day 40-75: 368 mg/d phenytoin base | A 60 kg, mechanically ventilated patient who suffered from a generalized seizure followed by status epilepticus<br><br>Drug administration:<br>Day 3-14: IV<br><br>Day 15-39: PO, suspension<br><br>Day 40-75: PO, tablets<br><br>Day 10-20: NG feeding<br>Day 20-33: Fresubin liquid food concentrates<br>Day 34 on: normal eating | 1                    | 100            | 67                             | NR    | NR  | Corrected levels (µg/ml):<br><br>IV: 11-19<br>PO, susp: 5-11<br>PO, tablet: 14-16<br><br>Lowest Concentration:<br>Day 30 | <ul style="list-style-type: none"> <li>Interactions with the TF formula (Fresubin®)</li> </ul>                                                                                                                                                                                                                    | <ul style="list-style-type: none"> <li>Reduced concentrations when the suspension was co-administered with TF</li> <li>Concentrations recovered after change to solid food intake and tablets</li> </ul>                                    |
| Boulamery et al. <sup>6</sup> , 2010 (abstract) | Case report                | Phenytoin<br>300 mg QD was gradually increased to 600 mg QD                                                                    | Critical ill patient at the ICU for diet-induced encephalopathy with seizures<br><br>Enterally fed via a jejunal tube, drugs administered through the tube                                                                                                                                                                          | 1                    | 0              | 40                             | NR    | NR  | Undetectable or subtherapeutic                                                                                           | <ul style="list-style-type: none"> <li>Less phenytoin absorption in jejunum than duodenum</li> <li>Interactions with the TF formula</li> <li>The GI transit may have been affected by enteral feedings</li> <li>Interactions with other drugs</li> <li>Lowered pH in GI which decreased the absorption</li> </ul> | <ul style="list-style-type: none"> <li>Subtherapeutic concentrations and therapy failure</li> <li>TDM is necessary in this population</li> </ul>                                                                                            |

| Author, year                      | Study type  | Drug and dose                                                                                                                                                 | Study population                                                                                                                                                                                                                                                                                                                                                                                                    | N | Sex (% Male) | Age (years) | F (%) | AUC | C                                                                                           | Factors altering drug absorption                                                                                                                                                                | Main findings and clinical considerations                                                                                                                                                                                                                                                                                                              |
|-----------------------------------|-------------|---------------------------------------------------------------------------------------------------------------------------------------------------------------|---------------------------------------------------------------------------------------------------------------------------------------------------------------------------------------------------------------------------------------------------------------------------------------------------------------------------------------------------------------------------------------------------------------------|---|--------------|-------------|-------|-----|---------------------------------------------------------------------------------------------|-------------------------------------------------------------------------------------------------------------------------------------------------------------------------------------------------|--------------------------------------------------------------------------------------------------------------------------------------------------------------------------------------------------------------------------------------------------------------------------------------------------------------------------------------------------------|
| Maynard et al <sup>7</sup> , 1987 | Case report | Phenytoin, suspension<br>A: 1.0-1.2 g/day<br>B: 1.0-1.2 g/day<br>C: 1.6-1.8 g/day<br>D: 600 mg/day<br>E: 300-400 mg/day                                       | Patients who suffered from a large cerebral hemorrhage<br>Five investigations were made<br>A: Osmolite®, continuous TF<br>B: Osmolite®, TF held two hours before and after drug administration<br>C: Isocal®, TF held 09:00-17:00, drug given at 09:00 and 17:00<br>D: Meat-based formula, TF held 09:00-17:00, drug timing as with Isocal®<br>E: Meat-based formula, continuous TF, drug at 09:00<br><br>Weight NR | 1 | 0            | 47          | NR    | NR  | C <sub>max</sub> (µg/ml):<br>A: 9<br>B: 9<br>C: 14<br>D: 19<br>E: 9                         | <ul style="list-style-type: none"> <li>Interactions with feeding formula</li> </ul>                                                                                                             | <ul style="list-style-type: none"> <li>Higher doses were needed to achieve therapeutic concentrations when co-administered with Isocal®</li> <li>Therapeutic concentrations were obtained with higher doses of phenytoin with Isocal® or Osmolite®</li> <li>Therapeutic levels achieved with lower doses when given with meat-based formula</li> </ul> |
| Rodman et al. <sup>8</sup> , 1995 | Case report | Phenytoin<br>Day 11: 500 mg loading dose, followed by 100 mg q6h<br>Day 12: additional 500 mg loading dose<br>Day 15-20: 200 mg q12h<br>Day 21-33: 125 mg TID | Patient with generalized tonic-clonic seizure disorder<br><br>Investigations<br>Day 11: IV<br>Day 12: IV<br>Day 15: IV<br>Day 21-33: jejunostomy tube<br>Continuous TF (Jevityv®)<br><br>Weight: 64 kg                                                                                                                                                                                                              | 1 | 0            | 29          | NR    | NR  | Random (µg/ml):<br>Day 11: 5.6<br>Day 12: NR<br>Day 15: 19.1<br>Day 21: 9.3<br>Day 33: <2.5 | <ul style="list-style-type: none"> <li>Drug interactions</li> <li>Possible interactions with tubing</li> <li>Interactions with TF formula</li> <li>Distal jejunostomy tube placement</li> </ul> | <ul style="list-style-type: none"> <li>Subtherapeutic concentrations when phenytoin was given with enteral nutrition compared to IV administration</li> </ul>                                                                                                                                                                                          |

| Author, year                     | Study type                | Drug and dose                                                            | Study population                                                                                                                                                                                            | N                                            | Sex (% Male)                       | Age (years)                                  | F (%)            | AUC                                                                             | C                                                                                               | Factors altering drug absorption                                                                                                                              | Main findings and clinical considerations                                                                                                                                                                                                                                                             |
|----------------------------------|---------------------------|--------------------------------------------------------------------------|-------------------------------------------------------------------------------------------------------------------------------------------------------------------------------------------------------------|----------------------------------------------|------------------------------------|----------------------------------------------|------------------|---------------------------------------------------------------------------------|-------------------------------------------------------------------------------------------------|---------------------------------------------------------------------------------------------------------------------------------------------------------------|-------------------------------------------------------------------------------------------------------------------------------------------------------------------------------------------------------------------------------------------------------------------------------------------------------|
| Mink et al. <sup>9</sup> , 2011  | Prospective observational | Valproic acid or Levetiracetam<br><br>3 g QD, IV then liquid, both drugs | Patients at the ICU who suffered with, or were in high risk of developing, seizures<br><br>Groups<br>A: valproic acid<br>B: levetiracetam<br><br>Investigations were made for both IV and TF administration | 35<br><br>A: 17<br><br>B: 18                 | 40                                 | 51 ± 11.7                                    | A: NR<br>B: 70.3 | NR                                                                              | Mean (µmol/L):<br>A:<br>IV: 433 ± 92<br>TF: 454 ± 131<br><br>B:<br>IV: 160 ± 51<br>TF: 113 ± 58 | <ul style="list-style-type: none"> <li>Possibly GI dysfunction</li> </ul>                                                                                     | <ul style="list-style-type: none"> <li>TF administration of levetiracetam results in lower concentrations*</li> <li>Valproic acid absorption was not affected</li> <li>Lower concentrations in group A when co-administered with meropenem*</li> </ul>                                                |
| <b>ANTIMICROBIALS</b>            |                           |                                                                          |                                                                                                                                                                                                             |                                              |                                    |                                              |                  |                                                                                 |                                                                                                 |                                                                                                                                                               |                                                                                                                                                                                                                                                                                                       |
| Yuk et al. <sup>10</sup> , 1990  | Prospective observational | Ciprofloxacin 750 mg BID                                                 | Critical ill patients at the ICU<br><br>Groups<br>A: ND<br>B: NG<br>C: G<br><br>Continuous TF, interrupted only for dose administration                                                                     | 7<br><br>A: 4<br><br>B: 2<br><br>C: 1        | A: 100<br><br>B: 100<br><br>C: 100 | A: range 71-76<br><br>B: 61, 74<br><br>C: 47 | NR               | Mean AUC (mg*h/L):<br><br>A: 25.35 ± 8.28<br>B and C: 11.27 ± 5.39              | C <sub>max</sub> (mg/L):<br><br>A: 4.60 ± 1.11<br><br>B and C: 2.57 ± 1.00                      | <ul style="list-style-type: none"> <li>Possible degradation of ciprofloxacin in the stomach and reduced absorption due to unfavorable conditions</li> </ul>   | <ul style="list-style-type: none"> <li>Greater absorption in group A compared with group B and C</li> <li>With both NG and G administration resulting in lower C<sub>max</sub> and AUC values it may be reasonable to consider a dose greater than that studied.</li> </ul>                           |
| Cohn et al. <sup>11</sup> , 1995 | Prospective observational | Ciprofloxacin 750 mg BID                                                 | Abdominal postoperative patients at the SICU<br><br>Drug administration via NG.<br><br>Enteral feeding was held for 1 h after drug administration                                                           | 8 (9 enrolled, records lost for one patient) | 12.5                               | Mean: 74<br><br>Range: 48-92                 | NR               | Mean AUC (mg*h/L):<br><br>Dose one: 3.48 ± 3.15<br><br>Dose four: 17.74 ± 15.17 | C <sub>max</sub> (mg/L):<br><br>Dose one: 0.55 ± 0.59<br><br>Dose four: 2.14 ± 1.50             | <ul style="list-style-type: none"> <li>Non-intact GI tract directly after surgery</li> <li>Delayed gastric emptying</li> <li>Impaired GI perfusion</li> </ul> | <ul style="list-style-type: none"> <li>Poor absorption during the first 12 h</li> <li>AUC and C<sub>max</sub> were higher after dose four*</li> <li>C<sub>max</sub> lower than healthy subjects from other studies</li> </ul>                                                                         |
| Cohn et al. <sup>12</sup> , 1996 | Prospective observational | Ciprofloxacin 750 mg BID                                                 | Mechanically ventilated patients at the ICU with documented pneumonia<br><br>Drug administration via NG                                                                                                     | 7                                            | 71                                 | Mean: 52.1<br><br>Range: 34-71               | NR               | Mean AUC (mg*h/L):<br><br>Dose one: 9.90 ± 2.05<br><br>Dose four:               | C <sub>max</sub> (mg/L):<br><br>Dose one: 2.29 ± 0.24<br><br>Dose four: 2.23 ± 0.39             | <ul style="list-style-type: none"> <li>Interactions with the TF formula (Pulmocare®)</li> <li>Inter-patient variability</li> </ul>                            | <ul style="list-style-type: none"> <li>Moderate and variable absorption in ICU patients</li> <li>Serum concentrations were above MIC for many pathogenic bacteria</li> <li>C<sub>max</sub> and AUC comparable to those seen in healthy subjects after 500 mg, single dose in another study</li> </ul> |

| Author, year                         | Study type                 | Drug and dose                                                 | Study population                                                                                                                                                  | N                           | Sex (% Male)       | Age (years)                        | F (%)            | AUC                                                                        | C                                                                             | Factors altering drug absorption                                                                                         | Main findings and clinical considerations                                                                                                                                                                                                                                                                                                                                                                                                  |
|--------------------------------------|----------------------------|---------------------------------------------------------------|-------------------------------------------------------------------------------------------------------------------------------------------------------------------|-----------------------------|--------------------|------------------------------------|------------------|----------------------------------------------------------------------------|-------------------------------------------------------------------------------|--------------------------------------------------------------------------------------------------------------------------|--------------------------------------------------------------------------------------------------------------------------------------------------------------------------------------------------------------------------------------------------------------------------------------------------------------------------------------------------------------------------------------------------------------------------------------------|
|                                      |                            |                                                               | TF in all patients                                                                                                                                                |                             |                    |                                    |                  | 10.63 ± 2.11                                                               |                                                                               |                                                                                                                          |                                                                                                                                                                                                                                                                                                                                                                                                                                            |
| De Marie et al. <sup>13</sup> , 1998 | Prospective observational  | Ciprofloxacin<br>TF: 750 mg BID<br>IV: 400 mg BID             | Critically ill patients with severe GNIAI managed at the ICU<br><br>Investigations were made for both IV and TF (NG or ND) administration<br><br>Continuous TF    | 5                           | NR                 | Range: 27-76                       | 53.1 (43.5-62.8) | Mean AUC (mg*h/L):<br><br>TF: 19.1 (10.8-27.5)<br><br>IV: 19.3 (11.8-26.7) | C <sub>max,ss</sub> (mg/L):<br><br>TF: 3.2 (1.8-4.6)<br><br>IV: 6.8 (3.9-9.8) | <ul style="list-style-type: none"> <li>Interactions with the TF formula</li> </ul>                                       | <ul style="list-style-type: none"> <li>The AUC provided by enteral administration was like that provided by IV administration</li> <li>Authors concluded that adequate bioavailability and AUC was observed with 750 mg BID enteral dose</li> </ul>                                                                                                                                                                                        |
| Mimoz et al. <sup>14</sup> , 1998    | Prospective observational  | Ciprofloxacin<br>TF: 750 mg BID<br><br>IV: 400 mg BID         | Mechanically ventilated patients at the SICU<br><br>Investigations were made for both IV and NG administration<br><br>Continuous TF                               | 12                          | 92                 | 41 (19-75)                         | 44 (31-82)       | Mean AUC (mg*h/L):<br><br>NG: 8.4 (3.6-53.4)<br><br>IV: 10.3 (3.3-34.6)    | C <sub>max</sub> (mg/L):<br><br>NG: 2.3 (0.7-5.8)<br><br>IV: 4.1 (1.5-7.4)    | <ul style="list-style-type: none"> <li>Variability between patients</li> <li>Interactions with the TF formula</li> </ul> | <ul style="list-style-type: none"> <li>C<sub>max</sub> was reduced with NG administration but AUC was similar between routes.</li> <li>The IV dose resulted in C<sub>max</sub>/MIC values consistently in or above the 10-12 range, but the NG was less consistent</li> <li>A switch from IV to NG administration may need to be restricted to patients where assessments of drug levels are available</li> </ul>                          |
| Debon et al. <sup>15</sup> , 2002    | Prospective interventional | Ciprofloxacin immediate-release suspension, 500 or 750 mg BID | Mechanical ventilated patients at the ICU with documented pneumonia<br><br>Groups<br>A: 500 mg BID<br>B: 750 mg BID<br><br>NG administration<br><br>Continuous TF | 20<br><br>A: 10<br><br>B 10 | A: 30<br><br>B: 40 | A: 63 (50-90)<br><br>B: 65 (48-88) | NR               | Mean AUC (mg*h/L):<br><br>A: 24.7 (12.9-36.2)<br><br>B: 28.9 (18.3-47.5)   | C <sub>max</sub> (mg/L):<br><br>A: 2.6 (1.2-4.3)<br><br>B: 3.5 (1.5-5.9)      | <ul style="list-style-type: none"> <li>Absorption was not altered by TF formula</li> </ul>                               | <ul style="list-style-type: none"> <li>Both dosages resulted in C<sub>max</sub>/MIC values above the minimum needed for treating susceptible pathogens including: <i>H. influenzae</i>, <i>E. coli</i>, <i>P.mirabilis</i>, <i>Enterobacter spp.</i> and <i>K. pneumoniae</i></li> <li>The oral suspension appeared to have greater bioavailability than crushed oral tablets (750 mg), compared with results from other trials</li> </ul> |

| Author, year                          | Study type                 | Drug and dose                                                                     | Study population                                                                                                                                                                     | N                              | Sex (% Male)           | Age (years)                            | F (%) | AUC                                                                                                | C                                                                                              | Factors altering drug absorption                                                                                                                                                                                             | Main findings and clinical considerations                                                                                                                                                                                                                                                                                                                                                  |
|---------------------------------------|----------------------------|-----------------------------------------------------------------------------------|--------------------------------------------------------------------------------------------------------------------------------------------------------------------------------------|--------------------------------|------------------------|----------------------------------------|-------|----------------------------------------------------------------------------------------------------|------------------------------------------------------------------------------------------------|------------------------------------------------------------------------------------------------------------------------------------------------------------------------------------------------------------------------------|--------------------------------------------------------------------------------------------------------------------------------------------------------------------------------------------------------------------------------------------------------------------------------------------------------------------------------------------------------------------------------------------|
| De Smet et al. <sup>16</sup> , 2012   | Prospective observational  | Moxifloxacin 400 mg QD<br><br>(One patient received 600 mg due to morbid obesity) | Critically ill patients at the ICU with documented pneumonia<br>Investigations were made for both IV and TF administration                                                           | 4                              | 50                     | 41-64                                  | NR    | AUC <sub>0-24</sub> (mg*h/L):<br><br>TF: 40.13 (16.80-51.51)<br><br>IV: 51.21 (23.46-72.90)        | C <sub>max</sub> (mg/L):<br><br>TF: 4.07 (2.86-5.95)<br><br>IV: 7.27 (4.47-11.34)              | <ul style="list-style-type: none"> <li>High inter-individual variability</li> </ul>                                                                                                                                          | <ul style="list-style-type: none"> <li>Enteral administration is not bioequivalent to IV administration</li> <li>Low AUC/MIC values seen may suggest that efficacy is not achieved with enteral administration</li> <li>Both AUC/MIC and C<sub>max</sub>/MIC values attained with enteral administration did not meet the minimum values required for treating common pathogens</li> </ul> |
| Kees et al. <sup>17</sup> , 2013      | Prospective observational  | Moxifloxacin 400 mg QD                                                            | A population PK-model was conducted on patients at the ICU and SICU<br>Initial treatment with IV, followed by NG administration<br>Continuous TF                                     | 25<br><br>IV: 25<br><br>NG: 16 | IV: 80<br><br>NG: 87.5 | IV: 64 (18-78)<br><br>NG: 60.5 (18-78) | 76.4  | NR                                                                                                 | NR                                                                                             | <ul style="list-style-type: none"> <li>Crushed tablet administered through NG tube</li> </ul>                                                                                                                                | <ul style="list-style-type: none"> <li>Enteral bioavailability was lower, and more variable compared to healthy volunteers</li> <li>Authors concluded enteral administration may not be reliable with ICU patients</li> </ul>                                                                                                                                                              |
| Beysac et al. <sup>18</sup> , 1991    | Prospective observational  | Cefroxadine, single dose<br><br>A and B: 1000 mg<br><br>C: 250 mg                 | Trauma patients<br><br>Groups<br>A: TF formula 1<br>B: TF formula 2<br>C: healthy subjects, data from a previous study<br><br>NG Administration<br>Continuous TF<br>Crossover design | A and B: 18<br><br>C: 6        | A and B: 78            | A and B: 17-40<br><br>C: 22-50         | NR    | AUC <sub>0-∞</sub> (µg*h/ml):<br><br>A: 37.5 ± 10.50<br><br>B: 42.18 ± 13.50<br><br>C: 48.9 ± 5.95 | C <sub>max</sub> (mg/mL):<br><br>A: 18.13 ± 7.02<br><br>B: 20.08 ± 8.51<br><br>C: 25.05 ± 9.92 | <ul style="list-style-type: none"> <li>Impaired splanchnic flow</li> <li>Weaker migrating motor complex due to TF</li> <li>Reduced intraluminal diffusion and absorption due to low temperature on the TF formula</li> </ul> | <ul style="list-style-type: none"> <li>AUC and C<sub>max</sub> were normalized to a dose of 1000 mg in group C</li> <li>Lower AUC in group A compared with C*</li> <li>C<sub>max</sub> did not show differences between groups A and B compared to group C</li> </ul>                                                                                                                      |
| <b>ANTIFUNGALS</b>                    |                            |                                                                                   |                                                                                                                                                                                      |                                |                        |                                        |       |                                                                                                    |                                                                                                |                                                                                                                                                                                                                              |                                                                                                                                                                                                                                                                                                                                                                                            |
| Rosemurgy et al. <sup>19</sup> , 1995 | Prospective interventional | Fluconazole 100 mg, single dose, both routes                                      | Trauma and postoperative patients at the SICU<br><br>Groups<br>A: NG or NJ<br>B: IV                                                                                                  | 18<br><br>A: 8<br><br>B: 10    | A: 100<br><br>B: 80    | A: 53 ± 17.7<br><br>B: 43 ± 12.4       | 77    | Mean AUC (mg*h/L):<br><br>A: 35 ± 16.0<br><br>B: 46 ± 19.7                                         | C <sub>max</sub> (mg/L):<br><br>A: 1.55 ± 0.469<br><br>B: 1.48 ± 0.364                         | <ul style="list-style-type: none"> <li>DI dysfunction</li> </ul>                                                                                                                                                             | <ul style="list-style-type: none"> <li>AUC was non-significantly lower after enteral administration than IV</li> <li>Slightly higher C<sub>max</sub> was observed with enteral administration over IV</li> <li>Bioavailability is reduced compared to healthy individuals, though still substantial</li> </ul>                                                                             |

| Author, year                           | Study type                | Drug and dose                                         | Study population                                                                                                                                                                                                              | N                           | Sex (% Male)       | Age (years)                 | F (%)                              | AUC                                                                                                                         | C                                                                               | Factors altering drug absorption                                                                                                                                                           | Main findings and clinical considerations                                                                                                                                                                                                                                                                                                                                                     |
|----------------------------------------|---------------------------|-------------------------------------------------------|-------------------------------------------------------------------------------------------------------------------------------------------------------------------------------------------------------------------------------|-----------------------------|--------------------|-----------------------------|------------------------------------|-----------------------------------------------------------------------------------------------------------------------------|---------------------------------------------------------------------------------|--------------------------------------------------------------------------------------------------------------------------------------------------------------------------------------------|-----------------------------------------------------------------------------------------------------------------------------------------------------------------------------------------------------------------------------------------------------------------------------------------------------------------------------------------------------------------------------------------------|
| Zhou et al. <sup>20</sup> , 2001       | Prospective observational | Fluconazole 200 mg, single dose, both routes          | Critically ill patients at the ICU<br><br>Investigations were made for both IV and TF (NG or ND) administration<br><br>Continuous or bolus TF                                                                                 | 5                           | 60                 | 60.4<br><br>Range 46-80     | 77 ± 44                            | Mean AUC (mg*h/L):<br><br>TF: 202.6 (115.03-385.65)<br><br>IV: 321.1 (102.93-471.36)                                        | C <sub>max</sub> (mg/L):<br><br>TF: 4.3 (2.81-5.53)<br><br>IV: 4.7 (1.33-10.13) | <ul style="list-style-type: none"> <li>Inter-individual variability</li> </ul>                                                                                                             | <ul style="list-style-type: none"> <li>Trend to lower systemic availability with enteral administration may be overcome with increased doses</li> <li>Lower AUC and C<sub>max</sub> after TF administration</li> <li>Authors have concluded that fluconazole given through TF should give adequate serum concentrations for the treatment of fungal infections</li> </ul>                     |
| Barquist et al. <sup>21</sup> , 2007   | Prospective observational | Fluconazole 400 mg loading dose followed by 200 mg QD | Postoperative abdominal trauma patients at the TICU<br><br>Groups<br>A: postoperative laparostomy patients<br>B: postoperative patients with closed abdomen<br><br>Investigations were made for both IV and TF administration | 16<br><br>A: 6<br><br>B: 10 | A: 83<br><br>B: 90 | A: 38 ± 9<br><br>B: 48 ± 18 | A: 51.3 ± 29.7<br><br>B: 63 ± 19.5 | Mean AUC (mcg/ml):<br><br>A, TF: 53.7 ± 18.5<br><br>A, IV: 115.1 ± 34<br><br>B, TF: 106.2 ± 59.6<br><br>B, IV: 166.9 ± 71.5 | C <sub>max</sub> (mcg/ml):<br><br>A, TF: 4.2 ± 1.5<br><br>B, TF: 7.0 ± 3.8      | <ul style="list-style-type: none"> <li>Impaired absorption capacity due to open abdomen</li> <li>Hyper-metabolic state (common in this patient population)</li> </ul>                      | <ul style="list-style-type: none"> <li>Lower enteral AUC in group A after TF administration*</li> <li>Lower C<sub>max</sub> in group A*</li> <li>Lower bioavailability in group A</li> <li>Varieted and unpredictable bioavailability in the study population</li> <li>IV administration may give more reliable serum levels in the first 2 weeks after trauma-related laparostomy</li> </ul> |
| Störzinger et al. <sup>22</sup> , 2012 | Prospective observational | Posaconazole 200 mg q6h                               | A population PK-model on abdominal surgery patients at the SICU<br><br>Drug administration via NG.<br>Continuous TF<br>PPI were given to all                                                                                  | 15                          | 40                 | 58 (41-79)                  | NR                                 | NR                                                                                                                          | C <sub>max</sub> (µg/L):<br><br>295 ± 152<br><br>Mean (µg/L):<br><br>175 ± 77   | <ul style="list-style-type: none"> <li>Simultaneously treatment with PPI in all patients</li> <li>GI dysfunction</li> <li>Malabsorption</li> <li>Interactions with feeding tube</li> </ul> | <ul style="list-style-type: none"> <li>Target concentration was 700 µg/L, and no patient displayed this value by day 7.</li> <li>Inadequate and unpredictable serum concentrations were observed</li> <li>The authors concluded that the use of enteral posaconazole is likely not appropriate in critically ill surgical</li> </ul>                                                          |

| Author, year                                | Study type                 | Drug and dose                                                                                      | Study population                                                                                                                                                                              | N                    | Sex (% Male)   | Age (years)                      | F (%) | AUC                                                        | C                                                                                                   | Factors altering drug absorption                                                                                                                                                                                                          | Main findings and clinical considerations                                                                                                                                                                                                                                                                                                                                                                         |
|---------------------------------------------|----------------------------|----------------------------------------------------------------------------------------------------|-----------------------------------------------------------------------------------------------------------------------------------------------------------------------------------------------|----------------------|----------------|----------------------------------|-------|------------------------------------------------------------|-----------------------------------------------------------------------------------------------------|-------------------------------------------------------------------------------------------------------------------------------------------------------------------------------------------------------------------------------------------|-------------------------------------------------------------------------------------------------------------------------------------------------------------------------------------------------------------------------------------------------------------------------------------------------------------------------------------------------------------------------------------------------------------------|
|                                             |                            |                                                                                                    | patients for stress ulcer prophylaxis                                                                                                                                                         |                      |                |                                  |       |                                                            |                                                                                                     |                                                                                                                                                                                                                                           | patients                                                                                                                                                                                                                                                                                                                                                                                                          |
| Ray et al. <sup>23</sup> , 2011             | Prospective interventional | Posaconazole 200 mg QID or 400 mg BID                                                              | Critically ill patients at the ICU<br>Groups<br>A: 200 mg QID<br>B: 400 mg BID<br>Drug administration via NG.<br>Continuous TF<br>PPI were given to all patients for stress ulcer prophylaxis | 27<br>A: 14<br>B: 13 | A: 79<br>B: 62 | A: 44.8 ± 22.7<br>B: 56.8 ± 17.3 | NR    | After first dose (µg*h/L):<br>A: 299 ± 198<br>B: 761 ± 242 | C <sub>max</sub> (µg/L):<br>A: 84 ± 50<br>B: 111 ± 45                                               | <ul style="list-style-type: none"> <li>Highest plasma posaconazole concentrations seen in patients with frequent TF interruptions</li> <li>Co-administration with PPI</li> <li>Lower AUC when co-administration with phenytoin</li> </ul> | <ul style="list-style-type: none"> <li>Impaired absorption. Desirable concentration for prophylaxis is 250 µg/L. The majority failed to achieve this target concentration</li> <li>C<sub>max</sub> in healthy subjects, 200 mg: ~ 325 µg/L (from different study data)</li> <li>Systemic exposure was lower than seen in healthy subjects (<i>also from other study data</i>)</li> <li>TDM recommended</li> </ul> |
| Kintzel et al. <sup>24</sup> , 1995         | Case report                | Itraconazole 400 mg QD, intralipid suspension<br><br>Followed by 600 mg QD, citric acid suspension | A:<br>mechanically ventilated patient at the ICU who had undergone allogeneic BMT<br><br>Drug administration via gastric tube                                                                 | 1                    | 100            | 38                               | NR    | NR                                                         | (µg/L):<br>Predose, 400 mg: NR<br>Postdose, 400 mg: 5<br>Predose 600 mg: 72<br>Postdose, 600 mg: 97 | <ul style="list-style-type: none"> <li>Impaired solubility due to increased gastric pH</li> <li>Delayed gastric emptying</li> <li>Impaired GI function and perfusion</li> </ul>                                                           | <ul style="list-style-type: none"> <li>Neither suspension gave desirable serum concentrations</li> <li>Citric acid suspension may have resulted in greater absorption compared to the intralipid suspension in case A</li> </ul>                                                                                                                                                                                  |
|                                             |                            | Itraconazole 600 mg QD, intralipid suspension on readmission                                       | B:<br>mechanically ventilated patient at the ICU who had undergone allogeneic BMT<br><br>Drug administration via gastric tube                                                                 | 1                    | 100            | 29                               |       |                                                            | (µg/L):<br>Baseline: 29<br>Predose: 19<br>Postdose: 18                                              |                                                                                                                                                                                                                                           |                                                                                                                                                                                                                                                                                                                                                                                                                   |
| <b>GASTRIC ACID SUPPRESSING MEDICATIONS</b> |                            |                                                                                                    |                                                                                                                                                                                               |                      |                |                                  |       |                                                            |                                                                                                     |                                                                                                                                                                                                                                           |                                                                                                                                                                                                                                                                                                                                                                                                                   |

| Author, year                         | Study type                 | Drug and dose                                 | Study population                                                                                                                                                        | N                                     | Sex (% Male)        | Age (years)                          | F (%)                                               | AUC                                                                                                                                           | C                                                                                                                                       | Factors altering drug absorption                                                                                               | Main findings and clinical considerations                                                                                                                                                                                                                                                                                                                             |
|--------------------------------------|----------------------------|-----------------------------------------------|-------------------------------------------------------------------------------------------------------------------------------------------------------------------------|---------------------------------------|---------------------|--------------------------------------|-----------------------------------------------------|-----------------------------------------------------------------------------------------------------------------------------------------------|-----------------------------------------------------------------------------------------------------------------------------------------|--------------------------------------------------------------------------------------------------------------------------------|-----------------------------------------------------------------------------------------------------------------------------------------------------------------------------------------------------------------------------------------------------------------------------------------------------------------------------------------------------------------------|
| Olsen et al. <sup>25</sup> , 2008    | Prospective interventional | Lansoprazole, 30 mg                           | Mechanically ventilated patients at the ICU<br><br>Groups<br>A: IV<br>B: NG<br><br>Enteral feeding was held 1 h after drug administration                               | 19<br><br>A: 9<br>B: 10               | A: 56<br><br>B: 60  | A: 59.7 ± 11.7<br><br>B: 56.8 ± 16.2 | 76                                                  | AUC <sub>0-24</sub> (ng*h/ml)<br><br>A, day 1: 2102 ± 380<br><br>A, day 3: 2198 ± 321<br><br>B, day 1: 1597 ± 369<br><br>B, day 3: 1992 ± 474 | C <sub>max</sub> (ng/ml)<br><br>A, day 1: 1127 ± 234<br><br>A, day 3: 1244 ± 207<br><br>B, day 1: 993 ± 230<br><br>B, day 3: 1103 ± 299 | <ul style="list-style-type: none"> <li>GI dysfunction</li> </ul>                                                               | <ul style="list-style-type: none"> <li>Lower AUC in group B on both day 1 and 3*</li> <li>Lower C<sub>max</sub> in group B on both day 1 and 3*</li> <li>TF administration had a faster onset and maintained gastric pH &gt;4 longer than IV administration at both 24 and 72 h*</li> <li>Enteral lansoprazole suppressed acid to a greater extent than IV</li> </ul> |
| Tanswell et al. <sup>26</sup> , 1990 | Prospective observational  | Pirenzepine<br><br>IV: 10 mg<br><br>PO: 50 mg | Groups<br>A: critically ill patients at the ICU<br>B: healthy subjects<br><br>Investigations were made for both IV and PO administration in both groups                 | 39<br><br>A: 27<br>B: 12              | A: 74<br><br>B: 100 | A: 60 ± 17<br><br>B: 36 (25-46)      | A: 28 ± 13<br><br>B: 14 ± 3.5                       | NR                                                                                                                                            | NR                                                                                                                                      | <ul style="list-style-type: none"> <li>GI dysmotility may prolong the residence time of pirenzepine in the GI tract</li> </ul> | <ul style="list-style-type: none"> <li>Higher bioavailability in critically ill patients compared with healthy subjects*</li> </ul>                                                                                                                                                                                                                                   |
| <b>CARDIOVASCULAR MEDICATIONS</b>    |                            |                                               |                                                                                                                                                                         |                                       |                     |                                      |                                                     |                                                                                                                                               |                                                                                                                                         |                                                                                                                                |                                                                                                                                                                                                                                                                                                                                                                       |
| Woodcock et al. <sup>27</sup> , 1981 | Prospective observational  | Verapamil<br><br>PO: 80 mg<br><br>IV: 5 mg    | Groups<br><br>A: patients with liver disease<br><br>B: patients at the ICU<br><br>C: healthy subjects<br><br>Investigations were made for both IV and PO administration | 8<br><br>A: 4<br><br>B: 2<br><br>C: 2 | NR                  | 16-64                                | A: 3.8-63.8<br><br>B: 13.2-13.6<br><br>C: 17.5-21.0 | AUC (ng*min/ml):<br><br>A, IV: 5,952-13,860<br><br>A, PO: 8,467-60,741                                                                        | NR                                                                                                                                      | <ul style="list-style-type: none"> <li>Not discussed</li> </ul>                                                                | <ul style="list-style-type: none"> <li>Data for bioavailability and AUC were only obtained from 4 patients in group A and 2 each in groups B and C</li> <li>Large differences in PK - clearance was reduced in group A, and increased in group B</li> <li>Clinically significant alterations in verapamil elimination was observed in groups A and B</li> </ul>       |

| Author, year                                     | Study type                    | Drug and dose                                                     | Study population                                                                                                                                                                                                              | N                                     | Sex (% Male)       | Age (years)                                | F (%)                                                    | AUC                                                                                                                            | C                                                                                                           | Factors altering drug absorption                                                                                                           | Main findings and clinical considerations                                                                                                                                                                                                                                                                                                                                                                                                                                         |
|--------------------------------------------------|-------------------------------|-------------------------------------------------------------------|-------------------------------------------------------------------------------------------------------------------------------------------------------------------------------------------------------------------------------|---------------------------------------|--------------------|--------------------------------------------|----------------------------------------------------------|--------------------------------------------------------------------------------------------------------------------------------|-------------------------------------------------------------------------------------------------------------|--------------------------------------------------------------------------------------------------------------------------------------------|-----------------------------------------------------------------------------------------------------------------------------------------------------------------------------------------------------------------------------------------------------------------------------------------------------------------------------------------------------------------------------------------------------------------------------------------------------------------------------------|
|                                                  |                               |                                                                   |                                                                                                                                                                                                                               |                                       |                    |                                            |                                                          | B, IV:<br>1,179-<br>1,983<br><br>B, PO:<br>2,484-<br>4,324<br><br>C, IV:<br>3,979-<br>7,142<br><br>C, PO:<br>11,040-<br>11,970 |                                                                                                             |                                                                                                                                            |                                                                                                                                                                                                                                                                                                                                                                                                                                                                                   |
| Schoergen<br>ofer et al. <sup>28</sup> ,<br>2017 | Prospective<br>interventional | ASA<br><br>A: 81 mg BID<br><br>B: 100 mg BID<br><br>C: 100 mg BID | Critically ill patients at<br>the ICU, diagnosed<br>with HTPR<br>Groups<br>A: PO, chewable tablet<br>B: IV<br>C: PO, enteric-coated<br>tablet<br>Treatment for one day                                                        | 30<br><br>A: 10<br><br>B: 10<br>C: 10 | 51                 | 67 ± 13                                    | NR                                                       | NR                                                                                                                             | C <sub>11</sub> ASA (ng/ml)<br><br>A: 202 (0–720)<br><br>B: 220 (110-<br>607)<br><br>C: 143 (0-255)         | <ul style="list-style-type: none"> <li>Reduced GI motility</li> </ul>                                                                      | <ul style="list-style-type: none"> <li>Higher concentration in group B compared with C</li> <li>Similar concentrations in group A and C</li> <li>Platelet aggregation did not differ between the groups</li> <li>Oral formulations resulted in highly variable absorption</li> </ul>                                                                                                                                                                                              |
| Součková<br>et al. <sup>29</sup> ,<br>2013       | Prospective<br>observational  | Clopidogrel<br>600 mg, loading<br>dose                            | Patients who suffered<br>from CAD<br><br>Groups<br><br>A: PO, intact tablet.<br>Had undergone<br>planned PCI with stent<br>implantation<br><br>B: NG. Critically ill<br>after CPR and acute<br>PCI with stent<br>implantation | 19<br><br>A: 10<br><br>B: 9           | A: 60<br><br>B: 67 | A: 72 (55–<br>86)<br><br>B: 66 (47–<br>81) | Exact<br>numbers<br>NR<br><br>Impaired<br>in group<br>B* | NR                                                                                                                             | [CLP <sub>metabolite</sub> ]<br>(ng/mL)<br><br>A: 18,455<br>(18,146-22,198)<br><br>B: 11,906 (0-<br>17,397) | <ul style="list-style-type: none"> <li>GI dysfunction</li> <li>Delayed gastric emptying</li> <li>Decreased splanchnic perfusion</li> </ul> | <ul style="list-style-type: none"> <li>Impaired bioavailability in group B*</li> <li>Group B: four patients had undetectable concentrations; remaining patients had delayed absorption</li> <li>All patients reached clinical inhibition in group A; two patients reached it in group B*</li> <li>Platelet inhibition after 24h: group A 70%, group B 26%. Clinically effective level: &gt;50%.</li> <li>Increased risk of stent thrombosis in critically ill patients</li> </ul> |
| <b>OTHER MEDICATIONS</b>                         |                               |                                                                   |                                                                                                                                                                                                                               |                                       |                    |                                            |                                                          |                                                                                                                                |                                                                                                             |                                                                                                                                            |                                                                                                                                                                                                                                                                                                                                                                                                                                                                                   |

| Author, year                            | Study type                 | Drug and dose                                                   | Study population                                                                                                                                           | N                          | Sex (% Male)            | Age (years)                           | F (%) | AUC                                                  | C                                                                                         | Factors altering drug absorption                                                                                                                                                   | Main findings and clinical considerations                                                                                                                                                                                                                                                                                 |
|-----------------------------------------|----------------------------|-----------------------------------------------------------------|------------------------------------------------------------------------------------------------------------------------------------------------------------|----------------------------|-------------------------|---------------------------------------|-------|------------------------------------------------------|-------------------------------------------------------------------------------------------|------------------------------------------------------------------------------------------------------------------------------------------------------------------------------------|---------------------------------------------------------------------------------------------------------------------------------------------------------------------------------------------------------------------------------------------------------------------------------------------------------------------------|
| Bourne et al. <sup>30</sup> , 2008      | Prospective interventional | Melatonin 10 mg, oral liquid                                    | Mechanically ventilated patients at the ICU<br><br>Groups<br>A: placebo<br>B: melatonin<br><br>TF administration                                           | 21<br>A: 9<br>B: 12        | A: 58.3<br>B: 33.3      | A: 58.7 ± 12.5<br>B: 69.9 ± 12.0      | NR    | AUC <sub>0-24</sub> (ng*h/L):<br>B: 29,979           | C <sub>max</sub> (ng/L):<br>B: 14,974                                                     | <ul style="list-style-type: none"> <li>Melatonin appeared to be rapidly absorbed</li> </ul>                                                                                        | <ul style="list-style-type: none"> <li>A higher C<sub>max</sub> was observed compared with healthy subjects from other studies</li> <li>Supratherapeutic morning concentrations seen and authors expressed concern regarding possible carryover effects</li> </ul>                                                        |
| Bellapart et al. <sup>31</sup> , 2016   | Prospective interventional | Melatonin 3 mg loading dose followed by 0.5 mg q1h (total 6 mg) | Critically ill patients<br><br>Groups<br>A: melatonin<br>B: placebo<br><br>NG administration                                                               | 13<br>A: 7<br>B: 6         | NR                      | 55 (35-78)                            | NR    | NR                                                   | Group A: generally supra-physiological concentrations<br>Group B: frequently undetectable | <ul style="list-style-type: none"> <li>High dose</li> </ul>                                                                                                                        | <ul style="list-style-type: none"> <li>Exogenous administration resulted in supra-physiological concentrations in critically ill patients</li> <li>Good oral bioavailability in critically ill patients</li> </ul>                                                                                                        |
| Mistraletti et al. <sup>32</sup> , 2010 | Prospective interventional | Melatonin 3 mg                                                  | Mechanical ventilated patients at the ICU<br><br>NG or NJ administration                                                                                   | 12<br>A: 6<br>B: 6         | A: 83<br>B: 83          | A: 62 (58-71)<br>B: 74 (56-81)        | NR    | AUC (pg*h/ml):<br>28,231                             | C <sub>max</sub> (ng/L):<br>11,039                                                        | <ul style="list-style-type: none"> <li>Crushed tablet</li> <li>NG administration</li> <li>Continuous TF</li> <li>Prokinetic drugs and post-pyloric access in 3 patients</li> </ul> | <ul style="list-style-type: none"> <li>Melatonin levels were impaired before treatment started</li> <li>Concentration peak reached a higher level and was reached faster in critically ill patients than healthy subjects</li> <li>No excessive sleepiness reported</li> </ul>                                            |
| Mistraletti et al. <sup>33</sup> , 2019 | Prospective interventional | Melatonin 3 mg, all groups                                      | Mechanical ventilated patients at the ICU<br>Groups<br>A: NG/NJ, crushed and suspended tablet<br>B: NG/NJ, lyophilized powder suspension<br>C: transdermal | 21<br>A: 7<br>B: 7<br>C: 7 | A: 86<br>B: 71<br>C: 71 | A: 69 ± 13<br>B: 71 ± 12<br>C: 73 ± 5 | NR    | AUC (ng*h/L):<br>A: 44,441<br>B: 157,386<br>C: 3,142 | C <sub>max</sub> (ng/L):<br>A: 26,813<br>B: 61,234<br>C: 388                              | <ul style="list-style-type: none"> <li>Lyophilized suspension lymphatically absorbed</li> </ul>                                                                                    | <ul style="list-style-type: none"> <li>Avoidance of hepatic first metabolism with suspension</li> <li>Higher AUC in group B compared with group A and C*</li> <li>Higher C<sub>max</sub> in group B and compared with group A and C*</li> <li>Enteral administration adequate to obtain pharmacological levels</li> </ul> |

| Author, year                       | Study type                 | Drug and dose                      | Study population                                                                                                                                                                                     | N                   | Sex (% Male)   | Age (years)                        | F (%) | AUC                                                                             | C                                          | Factors altering drug absorption                                                                                            | Main findings and clinical considerations                                                                                                                        |
|------------------------------------|----------------------------|------------------------------------|------------------------------------------------------------------------------------------------------------------------------------------------------------------------------------------------------|---------------------|----------------|------------------------------------|-------|---------------------------------------------------------------------------------|--------------------------------------------|-----------------------------------------------------------------------------------------------------------------------------|------------------------------------------------------------------------------------------------------------------------------------------------------------------|
| Polito et al. <sup>34</sup> , 2016 | Prospective, observational | Fludrocortisone 50 µg, single dose | A population PK-model on patients with septic shock at the ICU<br><br>Groups are presented depending on concentrations<br><br>A: detectable<br><br>B: undetectable<br><br>Drug administration via NG | 21<br>A: 14<br>B: 7 | A: 56<br>B: 29 | A: 65 (57-75)<br><br>B: 55 (54-65) | NR    | AUC <sub>0-∞</sub> (µg*h/L):<br><br>A: 1.25 (95% confidence interval 1.09-1.46) | C <sub>max</sub> (µg/L):<br>A: 0.19 ± 0.11 | <ul style="list-style-type: none"> <li>Simultaneous treatment with PPI (drug ionization dependent on gastric pH)</li> </ul> | <ul style="list-style-type: none"> <li>Serum concentrations were undetectable in one-third of the patients</li> <li>High inter-individual variability</li> </ul> |

| Author, year                       | Study type                | Drug and dose         | Study population                                                                                                                                                                                                                                                                  | N                                                              | Sex (% Male) | Age (years)                                  | F (%)    | AUC                                                                                                                                                                                                                                                                                                                                         | C                                                                                                                                                                                                                                                                                                                                | Factors altering drug absorption                                                                                                                                                                                                                                  | Main findings and clinical considerations                                                                                                                                                                                                                                                                                                                                                                                             |
|------------------------------------|---------------------------|-----------------------|-----------------------------------------------------------------------------------------------------------------------------------------------------------------------------------------------------------------------------------------------------------------------------------|----------------------------------------------------------------|--------------|----------------------------------------------|----------|---------------------------------------------------------------------------------------------------------------------------------------------------------------------------------------------------------------------------------------------------------------------------------------------------------------------------------------------|----------------------------------------------------------------------------------------------------------------------------------------------------------------------------------------------------------------------------------------------------------------------------------------------------------------------------------|-------------------------------------------------------------------------------------------------------------------------------------------------------------------------------------------------------------------------------------------------------------------|---------------------------------------------------------------------------------------------------------------------------------------------------------------------------------------------------------------------------------------------------------------------------------------------------------------------------------------------------------------------------------------------------------------------------------------|
| Berger et al. <sup>35</sup> , 2000 | Prospective observational | Acetaminophen 1000 mg | Postoperative cardiac surgery patients<br><br>Groups<br><br>A: normal hemodynamic status. Managed at the high-dependency unit.<br><br>B: hemodynamically unstable. Mechanically ventilated, managed at the ICU<br><br>C: healthy subjects<br><br>Drug administration via NG or PP | 45<br><br>A: NG, 11; PP, 5<br><br>B: NG, 17; PP, 6<br><br>C: 6 | NR           | A: 57 ± 10<br><br>B: 69 ± 8<br><br>C: 37 ± 6 | NR       | AUC <sub>240</sub> (unit not listed):<br><br>A, NG, day 1: 892 ± 926<br><br>A, NG, day 3: 2262 ± 502<br><br>A, PP, day 1: 2350 ± 983<br><br>A, PP, day 3: NR<br><br>B, NG, day 1: 826 ± 384<br><br>B, NG, day 3: 1781 ± 853<br><br>B, PP, day 1: 2513 ± 870<br><br>B, PP, day 3: 2375 ± 590<br><br>C, day 1: 2075 ± 509<br><br>C, day 3: NR | C <sub>max</sub> (mg/ml):<br><br>A, NG, day 1: 3.9 ± 2.3<br><br>A, NG, day 3: 18.6 ± 4.6<br><br>A, PP, day 1: 26.9 ± 10.3<br><br>A, PP, day 3: NR<br><br>B, NG, day 1: 5.0 ± 2.8<br><br>B, NG, day 3: 12.5 ± 7.8<br><br>B, PP, day 1: 22.8 ± 9.0<br><br>B, PP, day 3: 26.9 ± 8.1<br><br>C, day 1: 16.5 ± 3.7<br><br>C, day 3: NR | <ul style="list-style-type: none"> <li>Delayed gastric emptying/pyloric closure</li> <li>Authors concluded that hemodynamic instability does not preclude intestinal absorption</li> <li>Opiates, especially on day 1 (morphine doses low after day 1)</li> </ul> | <ul style="list-style-type: none"> <li>Large interpatient variability observed</li> <li>AUC and C<sub>max</sub> were impaired in group A and B on day 1 after NG</li> <li>AUC and C<sub>max</sub> in group A and B were similar to C on day 1 after PP</li> <li>AUC in group A and B were similar to healthy subjects on day 3</li> <li>The increase in AUC between day 1 and 3 was significant in group A and B after NG*</li> </ul> |
| Ariano et                          | Prospective               | Acetaminophen         | Critically ill patients                                                                                                                                                                                                                                                           | 12                                                             | 75           | 60 ± 15                                      | 75% (53- | NR                                                                                                                                                                                                                                                                                                                                          | NR                                                                                                                                                                                                                                                                                                                               | NR                                                                                                                                                                                                                                                                | <ul style="list-style-type: none"> <li>The relative bioavailability of</li> </ul>                                                                                                                                                                                                                                                                                                                                                     |

| Author, year                              | Study type                 | Drug and dose                                 | Study population                                                                                                              | N                                                                                               | Sex (% Male) | Age (years)                                              | F (%) | AUC                                    | C                                             | Factors altering drug absorption                                                                                                           | Main findings and clinical considerations                                                                                                                                                                                                                                                                            |
|-------------------------------------------|----------------------------|-----------------------------------------------|-------------------------------------------------------------------------------------------------------------------------------|-------------------------------------------------------------------------------------------------|--------------|----------------------------------------------------------|-------|----------------------------------------|-----------------------------------------------|--------------------------------------------------------------------------------------------------------------------------------------------|----------------------------------------------------------------------------------------------------------------------------------------------------------------------------------------------------------------------------------------------------------------------------------------------------------------------|
| al. <sup>36</sup> , 2009 (abstract)       | observational              | suspension, 650 or 975 mg                     | NG administration                                                                                                             |                                                                                                 |              |                                                          | 85%   |                                        |                                               |                                                                                                                                            | acetaminophen in critically ill patients was 75%                                                                                                                                                                                                                                                                     |
| Mojtahedzadeh et al. <sup>37</sup> , 2008 | Prospective interventional | 50 IU of insulin<br><br>Metformin 1000 mg BID | Critical ill patients with SIRS and hyperglycemia<br><br>Groups<br>A: insulin IV<br>B: metformin PO<br>C: insulin + metformin | 33<br><br>11 in each arm.<br>Deaths occurred in each group leaving:<br><br>A: 7<br>B: 9<br>C: 8 | NR           | A: 41.5 ± 19.5<br><br>B: 47.5 ± 14<br><br>C: 48.5 ± 14.5 | NR    | AUC (ng*h/ml):<br><br>B: 6,710 ± 1,056 | C <sub>max</sub> (ng/ml):<br><br>B: 970 ± 185 | <ul style="list-style-type: none"> <li>• GI dysfunction</li> <li>• Hypoperfusion</li> <li>• Hypomotility during hospitalization</li> </ul> | <ul style="list-style-type: none"> <li>• Deficit in oral metformin absorption in critically ill patients observed</li> <li>• AUC and C<sub>max</sub> were lower than healthy subjects or outpatient subjects</li> <li>• No significant difference in the glycemic control was observed between the groups</li> </ul> |

ASA, acetylsalicylic acid; AUC, area under curve; BID, “bis in die”, twice a day; BMT, bone marrow transplant; C; concentration; CAD; coronary artery disease; CPR, cardiopulmonary resuscitation; DHA, docosahexaenoic acid; EPA, eicosapentaenoic acid; F; bioavailability; G, gastrostomy tube; GI, gastrointestinal; GNIAI, gram-negative intra-abdominal infections; HTPR; high on-treatment platelet reactivity; ICU, Intensive Care Unit; IU, international unit; IV, intravenous; MIC, minimum inhibitory concentration; N, number of participants in the study; ND, nasoduodenal tube; NG, nasogastric tube; NJ, nasojejunal tube; NR, not reported; PCI; percutaneous coronary intervention; PK, pharmacokinetics; PO; per oral; PP, postpyloric tube; PPI, proton pump inhibitors; “q\_h”, “q” stands for “quaque” and “h” indicates the number of hours between every dosing; QD, “quaque die, one a day; QID, “quater in die”, four times daily; SICU, Surgical Intensive Care Unit; SIRS, systemic inflammatory response syndrome; TDM, therapeutic drug monitoring; TF; tube feeding; TICU, Trauma Intensive Care Unit; TID, “ter in die”, three times a day. \* Statistically significant

#### Supplementary Table References:

1. Bauer LA. Interference of oral phenytoin absorption by continuous nasogastric feedings. *Neurology*. May 1982;32(5):570-572.
2. Sneed RC, Morgan WT. Interference of oral phenytoin absorption by enteral tube feedings. *Arch Phys Med Rehabil*. Sep 1988;69(9):682-684.
3. Faraji B, Yu PP. Serum phenytoin levels of patients on gastrostomy tube feeding. *J Neurosci Nurs*. Feb 1998;30(1):55-59.

4. Seyed Mojtaba Sohrevardi MAN. Enteral nutrition and phenytoin administration in head trauma patients. *Tanaffos*. 2008;7(3):59-62.
5. Taylor DM, Massey CA, Willson WG, et al. Lowered serum phenytoin concentrations during therapy with liquid food concentrates. *Ann Pharmacother*. Mar 1993;27(3):369.
6. A B, N S. Low phenytoin plasma concentrations in a critically ill patient. *Fundamental and Clinical Pharmacology*. 2010;24(SUPPL. 1):62-62.
7. Maynard GA, Jones KM, Guidry JR. Phenytoin absorption from tube feedings. *Arch Intern Med*. Oct 1987;147(10):1821.
8. D.P R, T.L S. Phenytoin malabsorption after jejunostomy tube delivery. *Pharmacotherapy*. 1995;15(6 I):801-805.
9. Mink S, Muroi C, Seule M, et al. Levetiracetam compared to valproic acid: plasma concentration levels, adverse effects and interactions in aneurysmal subarachnoid hemorrhage. *Clin Neurol Neurosurg*. Oct 2011;113(8):644-648.
10. J.H Y, C.H N, R Q, et al. Absorption of ciprofloxacin administered through a nasogastric or a nasoduodenal tube in volunteers and patients receiving enteral nutrition. *Diagnostic Microbiology and Infectious Disease*. 1990;13(2):99-102.
11. Cohn SM, Cohn KA, Rafferty MJ, et al. Enteric absorption of ciprofloxacin during the immediate postoperative period. *J Antimicrob Chemother*. Oct 1995;36(4):717-721.
12. S.M C, M.D S, G.A B, et al. Enteric absorption of ciprofloxacin during tube feeding in the critically ill. *Journal of Antimicrobial Chemotherapy*. 1996;38(5):871-876.
13. de Marie S, VandenBergh MF, Buijk SL, et al. Bioavailability of ciprofloxacin after multiple enteral and intravenous doses in ICU patients with severe gram-negative intra-abdominal infections. *Intensive Care Medicine*. 1998;24(4):343-346.
14. Mimoz O, Binter V, Jacolot A, et al. Pharmacokinetics and absolute bioavailability of ciprofloxacin administered through a nasogastric tube with continuous enteral feeding to critically ill patients. *Intensive Care Med*. Oct 1998;24(10):1047-1051.

15. Debon R, Breilh D, Boselli E, et al. Pharmacokinetic parameters of ciprofloxacin (500 mg/5 mL) oral suspension in critically ill patients with severe bacterial pneumonia: A comparison of two Dosages. *Journal of Chemotherapy*. 2002;14(2):175-180.
16. de Smet J, Colpaert K, de Paepe P, et al. Switch from intravenous to enteral moxifloxacin in critically ill patients: a pilot study. *Scandinavian journal of infectious diseases*. 2012;44(11):874-878.
17. Kees MG, Schaeftlein A, Haeberle HA, et al. Population pharmacokinetics and pharmacodynamic evaluation of intravenous and enteral moxifloxacin in surgical intensive care unit patients. *The Journal of antimicrobial chemotherapy*. 2013;68(6):1331-1337.
18. Beyssac E, Ritschel WA, Aiache JM, et al. Comparison of continuous, constant rate enteral tube feeding in supine patients to bolus food intake in ambulatory, healthy subjects regarding bioavailability of perorally administered cefroxadine. *Methods Find Exp Clin Pharmacol*. Nov 1991;13(9):637-642.
19. Rosemurgy AS, Markowsky S, Goode SE, et al. Bioavailability of fluconazole in surgical intensive care unit patients: a study comparing routes of administration. *J Trauma*. Sep 1995;39(3):445-447.
20. Zhou W, Nightingale CH, Davis GA, et al. Absolute bioavailability of fluconazole suspension in intensive care unit patients. *Journal of Infectious Disease Pharmacotherapy*. 2001;5(1):27-35.
21. Barquist ES, Gomez-Fein E, Block EF, et al. Bioavailability of oral fluconazole in critically ill abdominal trauma patients with and without abdominal wall closure: a randomized crossover clinical trial. *J Trauma*. Jul 2007;63(1):159-163.
22. Storzinger D, Borghorst S, Hofer S, et al. Plasma concentrations of posaconazole administered via nasogastric tube in patients in a surgical intensive care unit. *Antimicrob Agents Chemother*. Aug 2012;56(8):4468-4470.
23. Ray J, Campbell L, Rudham S, et al. Posaconazole plasma concentrations in critically ill patients. *Ther Drug Monit*. Aug 2011;33(4):387-392.

24. Kintzel PE, Rollins CJ, Yee WJ, et al. Low itraconazole serum concentrations following administration of itraconazole suspension to critically ill allogeneic bone marrow transplant recipients. *Ann Pharmacother*. Feb 1995;29(2):140-143.
25. Olsen KM, Devlin JW, K.M O, et al. Comparison of the enteral and intravenous lansoprazole pharmacodynamic responses in critically ill patients. *Alimentary Pharmacology and Therapeutics*. 2008;28(3):326-333.
26. Tanswell P, Hofgartner F, Bozler G, et al. Absolute bioavailability of pirenzepine in intensive care patients. *Eur J Clin Pharmacol*. 1990;38(3):265-268.
27. Woodcock BG, Rietbrock I, Vohringer HF, et al. Verapamil disposition in liver disease and intensive-care patients: Kinetics, clearance, and apparent blood flow relationships. *Clinical Pharmacology and Therapeutics*. 1981;29(1):27-34.
28. Schoergenhofer C, Hobl EL, Schwameis M, et al. Acetylsalicylic acid in critically ill patients: a cross-sectional and a randomized trial. *Eur J Clin Invest*. Jul 2017;47(7):504-512.
29. Souckova L, Opatrilova R, Suk P, et al. Impaired bioavailability and antiplatelet effect of high-dose clopidogrel in patients after cardiopulmonary resuscitation (CPR). *European journal of clinical pharmacology*. 2013;69(3):309-317.
30. Bourne RS, Mills GH, Minelli C. Melatonin therapy to improve nocturnal sleep in critically ill patients: encouraging results from a small randomised controlled trial. *Crit Care*. 2008;12(2):R52.
31. Bellapart J, Roberts JA, Appadurai V, et al. Pharmacokinetics of a novel dosing regimen of oral melatonin in critically ill patients. *Clin Chem Lab Med*. Mar 2016;54(3):467-472.
32. Mistraletti G, Sabbatini G, Taverna M, et al. Pharmacokinetics of orally administered melatonin in critically ill patients. *J Pineal Res*. Mar 2010;48(2):142-147.

33. Mistraletti G, Paroni R, Umbrello M, et al. Different routes and formulations of melatonin in critically ill patients. A pharmacokinetic randomized study. *Clinical endocrinology*. 2019;91(1):209-218.
34. Polito A, Hamitouche N, Ribot M, et al. Pharmacokinetics of oral fludrocortisone in septic shock. *Br J Clin Pharmacol*. Dec 2016;82(6):1509-1516.
35. Berger MM, Berger-Gryllaki M, Wiesel PH, et al. Intestinal absorption in patients after cardiac surgery. *Crit Care Med*. Jul 2000;28(7):2217-2223.
36. Ariano R, Zelenitsky S, Zivot J. The utility of acetaminophen absorption testing in the critically ill. *Canadian Journal of Hospital Pharmacy*. 2009;62(4):339-339.
37. Mojtahedzadeh M, Rouini M, Kajbaf F, et al. Advantage of adjunct metformin and insulin therapy in the management of glycemia in critically ill patients. Evidence for nonoccurrence of lactic acidosis and needing to parenteral metformin. *Archives of Medical Science*. 2008;4(2):174-181.

**Bioavailability of Orally Administered Drugs in Critically Ill Patients**

**Supplementary Table 2:** Summarizing table of all articles discussing unaltered drug absorption.

| Author, year          | Study type | Drug and dose | Study population | N | Sex (% Male) | Age (years) | F (%) | AUC | C | Factors altering drug absorption | Main findings and clinical considerations |
|-----------------------|------------|---------------|------------------|---|--------------|-------------|-------|-----|---|----------------------------------|-------------------------------------------|
| <b>Antimicrobials</b> |            |               |                  |   |              |             |       |     |   |                                  |                                           |

| Author, year                      | Study type                 | Drug and dose                                                                                             | Study population                                                                                                                | N                                                                                                                                                         | Sex (% Male)                    | Age (years) | F (%)                                             | AUC                                                                                                                                       | C                                                                                                                                                    | Factors altering drug absorption                                                                                                                                                                                                                | Main findings and clinical considerations                                                                                                                                                                                                                                                                                                                                                                                                                                                                                                                                                                                                                                                                    |
|-----------------------------------|----------------------------|-----------------------------------------------------------------------------------------------------------|---------------------------------------------------------------------------------------------------------------------------------|-----------------------------------------------------------------------------------------------------------------------------------------------------------|---------------------------------|-------------|---------------------------------------------------|-------------------------------------------------------------------------------------------------------------------------------------------|------------------------------------------------------------------------------------------------------------------------------------------------------|-------------------------------------------------------------------------------------------------------------------------------------------------------------------------------------------------------------------------------------------------|--------------------------------------------------------------------------------------------------------------------------------------------------------------------------------------------------------------------------------------------------------------------------------------------------------------------------------------------------------------------------------------------------------------------------------------------------------------------------------------------------------------------------------------------------------------------------------------------------------------------------------------------------------------------------------------------------------------|
| Rebuck et al. <sup>1</sup> , 2002 | Prospective observational  | Levofloxacin<br>500 mg Q24H<br><br>2 patients received 250 mg Q24H                                        | Critically ill patients (ICU)<br><br>Groups<br>A: IV levofloxacin, all patients<br><br>B: Oral levofloxacin, subset of patients | Total: 26<br><br>A: 26<br><br>B: 10                                                                                                                       | 83                              | 51 ± 12     | 95 ± 8                                            | AUC (mg*hr/L)<br><br>A: 66.1 ± 15.7<br><br>A, 10 patients that later received PO: 62.4 ± 6.3<br><br>B: 60.3 ± 16.3                        | C <sub>max</sub> (mg/L)<br><br>IV: 7.5 ± 0.8<br><br>PO: 5.5 ± 1.1                                                                                    | <ul style="list-style-type: none"> <li>No significant GI dysfunction in study population</li> </ul>                                                                                                                                             | <ul style="list-style-type: none"> <li>Increases in C<sub>max</sub> and AUC were found in critically ill patients given IV levofloxacin compared to data from healthy volunteers (historical)*</li> <li>Oral administration appears to result in AUC to IV administration, however C<sub>max</sub> was reduced with oral administration*</li> <li>Authors concluded that C<sub>max</sub>/MIC and AUC/MIC ratios would be appropriate for susceptible <i>S. pneumoniae</i> and gram-negative pathogens including <i>E. coli</i>, <i>K. pneumoniae</i>, <i>H. influenzae</i>, and <i>Enterobacter sp.</i> using IV administration in ICU patients. No conclusion was made using oral administration</li> </ul> |
| Kanji et al. <sup>2</sup> , 2003  | Prospective Interventional | Gatifloxacin 400 mg<br><br>Doses given either IV or NG, then given the opposite route after 72-hr washout | Critically ill patients<br><br>NG Feeds<br><br>A: Continuous TF<br><br>B: Interrupted TF                                        | 16<br><br>A: 8<br><br>B: 7<br><br>4 in each group got IV first and 4 got NG first<br><br>1 patient in B excluded with low serum drug levels after IV dose | 56<br><br>(sex of 1 patient NR) | 49 (18-67)  | A: 109.0 (86.2-142.1)<br><br>B: 98.5 (61.1-119.7) | AUC (µg*h/mL)<br><br>A, IV: 39.7 (22.5-63.1)<br><br>A, NG: 34.2 (23.9-85.5)<br><br>B, IV: 39.5 (24.1-63.1)<br><br>B, NG: 38.0 (20.1-48.5) | C <sub>max</sub> (µg/mL)<br><br>A, IV: 4.45 (3.05-5.39)<br><br>A, NG: 3.31 (2.18-6.60)<br><br>B, IV: 4.65 (3.03-7.78)<br><br>B, NG: 2.62 (1.15-6.60) | <ul style="list-style-type: none"> <li>Delayed gastric emptying or compromised mesenteric perfusion</li> <li>Loss of medication during preparation and administration</li> <li>Physiologic alterations over the 72-hr washout period</li> </ul> | <ul style="list-style-type: none"> <li>No significant differences in the average bioavailability between the continuous TF group and the interrupted TF group. However, a wide range was seen, and some patients had F &lt;70%</li> <li>Continuous enteral nutrition did not appear to reduce gatifloxacin bioavailability</li> <li>Bioavailability of enteral gatifloxacin in critically ill patients appears highly variable, and empirical treatment may not be appropriate for all ICU patients.</li> </ul>                                                                                                                                                                                              |

| Author, year                    | Study type                | Drug and dose                                                                                                                                    | Study population                                                                                                                                                                                                                                                                                                       | N            | Sex (% Male)     | Age (years)            | F (%)                                                                                                                                             | AUC | C                                                                                                                                                                                                                                                                                                                                                            | Factors altering drug absorption | Main findings and clinical considerations                                                                                                                                                                                                                                                                                                                                                                                                                                                                                                     |
|---------------------------------|---------------------------|--------------------------------------------------------------------------------------------------------------------------------------------------|------------------------------------------------------------------------------------------------------------------------------------------------------------------------------------------------------------------------------------------------------------------------------------------------------------------------|--------------|------------------|------------------------|---------------------------------------------------------------------------------------------------------------------------------------------------|-----|--------------------------------------------------------------------------------------------------------------------------------------------------------------------------------------------------------------------------------------------------------------------------------------------------------------------------------------------------------------|----------------------------------|-----------------------------------------------------------------------------------------------------------------------------------------------------------------------------------------------------------------------------------------------------------------------------------------------------------------------------------------------------------------------------------------------------------------------------------------------------------------------------------------------------------------------------------------------|
| Chin et al. <sup>3</sup> , 1995 | Prospective Observational | Trimethoprim 15 mg/kg<br>Sulfamethoxazole: 75 mg/kg<br>Drugs given IV or PO, then switched to receive the equivalent dose by the alternate route | Critically ill and non-critically ill AIDS patients with <i>P. carinii</i> pneumonia<br><br>A: Critically ill, requiring mechanical ventilation<br>B: Non-critically ill<br><br>Enteral doses given PO unless patient unable to take PO tablets<br><br>Patients on TF had feeds held while the drugs were administered | A: 8<br>B: 9 | A: 100<br>B: 100 | A: 37 ± 8<br>B: 37 ± 9 | A, trimethoprim: 97.5 ± 22.4<br><br>A, sulfamethoxazole: 86.2 ± 17.9<br><br>B, trimethoprim: 101.8 ± 22.7<br><br>B: sulfamethoxazole: 99.1 ± 20.5 | NR  | C <sub>max</sub> (µg/mL)<br><br>A, IV trimethoprim: 8.1 ± 2.6<br><br>A, IV sulfamethoxazole: 163.6 ± 21.5<br><br>A, PO trimethoprim: 6.6 ± 1.5<br><br>A, PO sulfamethoxazole: 145.8 ± 42.0<br><br>B, IV trimethoprim: 7.9 ± 3.2<br><br>B: IV sulfamethoxazole: 186.4 ± 59.9<br><br>B, PO trimethoprim: 8.3 ± 3.3<br><br>B: PO sulfamethoxazole: 181.8 ± 74.7 | • Not discussed                  | <ul style="list-style-type: none"> <li>Dosage adjustment does not appear necessary when switching from IV to PO</li> <li>Only 4 critically ill patients and 8 non-critically ill patients were evaluated for oral administration PK</li> <li>No significant difference in AUC was observed between IV and PO doses</li> <li>In critically ill patients, a switch from IV to PO trimethoprim-sulfamethoxazole may be feasible when tolerating oral feeds (good F observed), but the evidence is based on data from only 4 patients.</li> </ul> |

**Antifungals**

| Author, year                         | Study type                 | Drug and dose                                                                                                                                                 | Study population                                                                                                                             | N                                                                                                         | Sex (% Male) | Age (years) | F (%)                                                                                                            | AUC                                                                                                 | C                                                                                                              | Factors altering drug absorption                                                                                                                                                                                                                         | Main findings and clinical considerations                                                                                                                                                                                                                                                                                                                                                                                                |
|--------------------------------------|----------------------------|---------------------------------------------------------------------------------------------------------------------------------------------------------------|----------------------------------------------------------------------------------------------------------------------------------------------|-----------------------------------------------------------------------------------------------------------|--------------|-------------|------------------------------------------------------------------------------------------------------------------|-----------------------------------------------------------------------------------------------------|----------------------------------------------------------------------------------------------------------------|----------------------------------------------------------------------------------------------------------------------------------------------------------------------------------------------------------------------------------------------------------|------------------------------------------------------------------------------------------------------------------------------------------------------------------------------------------------------------------------------------------------------------------------------------------------------------------------------------------------------------------------------------------------------------------------------------------|
| Buijk et al. <sup>4</sup> (42), 2001 | Prospective Observational  | Fluconazole 400 mg IV Q24H<br><br>One additional 400 mg IV dose after 12 hours on day 1<br><br>Day 4: 400 mg via feeding tube (if clinical condition allowed) | Critically ill abdominal surgery patients in the ICU                                                                                         | 14<br><br>All received IV, 10 received oral, and data from 1 was excluded                                 | 71           | 53 (45-61)  | 124 (90-158)                                                                                                     | AUC (mg*h/L)<br><br>IV: 409 (336-482)<br><br>Enteral: 418 (319-516)                                 | C <sub>max</sub> (mg/L)<br><br>IV: 24.7 (21.7-27.8)<br><br>Enteral: 20.4 (16.5-24.2)                           | <ul style="list-style-type: none"> <li>Short bowel</li> </ul>                                                                                                                                                                                            | <ul style="list-style-type: none"> <li>Concentrations of fluconazole were adequate to treat most cases of deep mycoses in this group</li> <li>Bioavailability was reported very high in 3 patients, likely due to increased clearance with IV dosing compared to enteral dosing</li> <li>Fluconazole efficacy best determined by AUC/MIC. Data showed AUCs high enough to treat <i>Candida</i> infections with MIC of 16 mg/L</li> </ul> |
| Nicolau et al. <sup>5</sup> , 1995   | Prospective Observational  | Fluconazole 100 or 200 mg once daily<br><br>IV or enteral, eligible for switch to alternate route after 5 doses                                               | Critically ill patients requiring fluconazole<br><br>Continuous or bolus TF. Feeds held temporarily for drug administration if continuous TF | Total: 7<br><br>2 excluded from analysis (incomplete sampling)<br><br>5/7 patients received enteral doses | 100          | 45 (22-69)  | Entire population: 84.7 ± 18.6<br><br>After excluding 2 patients with recent rifampicin dosing (N=5): 97.2 ± 9.8 | AUC (mg*h/L)<br><br>Population average NR<br><br>Range, IV: 74.4-428.1<br><br>Range, TF: 68.1-470.9 | C <sub>max</sub> (mg/L)<br><br>Population average NR<br><br>Range, IV: 5.17-20.99<br><br>Range, TF: 3.43-22.62 | <ul style="list-style-type: none"> <li>Not discussed</li> </ul>                                                                                                                                                                                          | <ul style="list-style-type: none"> <li>Fluconazole had excellent enteral bioavailability in critically ill patients when given via feeding tube</li> <li>Data from patients who received rifampin was excluded as the results were likely skewed by the microsomal enzyme-inducing effects of rifampin</li> </ul>                                                                                                                        |
| Pelz et al. <sup>6</sup> , 2002      | Prospective Interventional | Fluconazole Loading Dose: 800 mg (all patients)<br><br>Maintenance Dose: 400 mg daily<br><br>If creatinine clearance <25                                      | Critically ill surgical patients in the ICU. Fluconazole used for prophylaxis<br><br>A: Fluconazole, PO, NG, or NJ<br><br>B: Placebo         | A: 121<br><br>B: 130                                                                                      | 57           | 63 (20-92)  | NR                                                                                                               | NR                                                                                                  | C random (µg/mL)<br><br>A, median: 11.9 (0-69.8)                                                               | <ul style="list-style-type: none"> <li>No significant differences in concentration seen with route of administration (gastric, oral, or jejunostomy)</li> <li>No significant differences in concentration seen with history of surgery Yes/No</li> </ul> | <ul style="list-style-type: none"> <li>Enteral administration resulted in serum levels above MIC for &gt;2/3 of <i>Candida</i> isolates</li> <li>Authors have concluded that enteral fluconazole is adequate for preventing more <i>Candida</i> infections in critically ill surgical patients.</li> </ul>                                                                                                                               |

| Author, year                                  | Study type                | Drug and dose                                                                                                                            | Study population                                                                                  | N  | Sex (% Male) | Age (years)  | F (%)                                        | AUC                                                              | C                                                                        | Factors altering drug absorption                                                                                                                  | Main findings and clinical considerations                                                                                                                                                                                                  |
|-----------------------------------------------|---------------------------|------------------------------------------------------------------------------------------------------------------------------------------|---------------------------------------------------------------------------------------------------|----|--------------|--------------|----------------------------------------------|------------------------------------------------------------------|--------------------------------------------------------------------------|---------------------------------------------------------------------------------------------------------------------------------------------------|--------------------------------------------------------------------------------------------------------------------------------------------------------------------------------------------------------------------------------------------|
|                                               |                           | mL/min, maintenance dose: 200 mg daily (22% of group A got this dose)                                                                    |                                                                                                   |    |              |              |                                              |                                                                  |                                                                          |                                                                                                                                                   |                                                                                                                                                                                                                                            |
| Karoubi et al. <sup>7</sup> , 2016 (abstract) | Prospective Observational | Voriconazole<br>Loading Dose: 6 mg/kg IV Q12H for 2 doses<br>Maintenance Dose: 5 mg/kg IV Q12H<br>Day 4 on: 5 mg/kg Q12H through NG tube | Critically ill patients on mechanical ventilation<br><br>Continuous TF                            | 8  | 63           | 67.5 (49-86) | 106 (77-135)                                 | NR                                                               | C <sub>max</sub> (mg/L)<br>IV: 5.8 ± 2.0<br>NG: 10.2 ± 4.2               | • Not discussed                                                                                                                                   | <ul style="list-style-type: none"> <li>Data suggests a switch to NG voriconazole after initial IV therapy could be used</li> <li>TDM recommended to avoid potential toxicity supratherapeutic concentrations seen in 4 patients</li> </ul> |
| <b>Antivirals</b>                             |                           |                                                                                                                                          |                                                                                                   |    |              |              |                                              |                                                                  |                                                                          |                                                                                                                                                   |                                                                                                                                                                                                                                            |
| Mulla et al. <sup>8</sup> , 2013              | Prospective Observational | Oseltamivir<br>Enteral, 75 mg BID<br>Administered by NG tube                                                                             | Critically ill adult patients with H1N1 influenza (suspected or confirmed) receiving ECMO support | 14 | 57           | 38.8 ± 7.42  | Oseltamivir 25<br>Oseltamivir carboxylate 75 | Median AUC (ng/h/mL) oseltamivir carboxylate<br>4346 (644-13660) | Median C <sub>max</sub> (ng/mL) oseltamivir carboxylate<br>509 (54-1277) | • Variability in PO bioavailability suspected to be from decreased gut motility and impaired gut perfusion as expected in critically ill patients | • Mean exposure of oseltamivir carboxylate (active metabolite) in critically ill ECMO patients was comparable to ambulatory patients (data from another study)                                                                             |

| Author, year                                  | Study type  | Drug and dose                                                       | Study population                                               | N | Sex (% Male) | Age (years)                                             | F (%) | AUC                                                                                                                                                            | C                                                                                                                                                   | Factors altering drug absorption                                | Main findings and clinical considerations                                                                                                                                                                                                                                                                        |
|-----------------------------------------------|-------------|---------------------------------------------------------------------|----------------------------------------------------------------|---|--------------|---------------------------------------------------------|-------|----------------------------------------------------------------------------------------------------------------------------------------------------------------|-----------------------------------------------------------------------------------------------------------------------------------------------------|-----------------------------------------------------------------|------------------------------------------------------------------------------------------------------------------------------------------------------------------------------------------------------------------------------------------------------------------------------------------------------------------|
| Taylor et al. <sup>9</sup> , 2008             | Case Series | Oseltamivir 150 mg BID x10 days                                     | Mechanically ventilated patients<br><br>NG drug administration | 3 | 33           | Patient A: 30<br><br>Patient B: 22<br><br>Patient C: 76 | NR    | AUC <sub>0-12</sub> (ng*h/mL)<br><br>Oseltamivir Phosphate<br>A: 395<br>B: 1059<br>C: 628<br><br>Oseltamivir Carboxylate<br>A: 5,932<br>B: 10,951<br>C: 34,670 | C <sub>max</sub> (ng/mL)<br><br>Oseltamivir Phosphate<br>A: 122<br>B: 156<br>C: 28.7<br><br>Oseltamivir Carboxylate<br>A: 591<br>B: 1210<br>C: 1270 | <ul style="list-style-type: none"> <li>Not discussed</li> </ul> | <ul style="list-style-type: none"> <li>Double dose oseltamivir with NG administration was absorbed well in these patients</li> <li>High AUC values likely due to reduced renal function in the patients</li> <li>2 patients died, possibly due to late treatment and advanced disease at presentation</li> </ul> |
| Tomlin et al. <sup>10</sup> , 2010 (abstract) | Case Study  | Oseltamivir 75 mg BID NG<br><br>Dose doubled after no response seen | Young adult female with H1N1 infection                         | 1 | 0            | NR                                                      | NR    | NR                                                                                                                                                             | Oseltamivir phosphate: 10-77 ng/mL<br><br>Oseltamivir carboxylate: 2,600-5,000 ng/mL                                                                | <ul style="list-style-type: none"> <li>Not discussed</li> </ul> | <ul style="list-style-type: none"> <li>Elevated oseltamivir carboxylate levels possibly due to reduced renal elimination</li> <li>Absorption did not appear to be affected</li> </ul>                                                                                                                            |

**GASTRIC ACID SUPPRESSING MEDICATIONS**

| Author, year                          | Study type                  | Drug and dose                                                                                       | Study population                                                                                                          | N                                                                                                              | Sex (% Male)          | Age (years)                             | F (%) | AUC | C                                                                                                                                                                                                               | Factors altering drug absorption                                                              | Main findings and clinical considerations                                                                                                                                                                                                                                                                                                                                                               |
|---------------------------------------|-----------------------------|-----------------------------------------------------------------------------------------------------|---------------------------------------------------------------------------------------------------------------------------|----------------------------------------------------------------------------------------------------------------|-----------------------|-----------------------------------------|-------|-----|-----------------------------------------------------------------------------------------------------------------------------------------------------------------------------------------------------------------|-----------------------------------------------------------------------------------------------|---------------------------------------------------------------------------------------------------------------------------------------------------------------------------------------------------------------------------------------------------------------------------------------------------------------------------------------------------------------------------------------------------------|
| Pemberton et al. <sup>11</sup> , 1993 | Prospective Interventional  | Ranitidine, NG administration<br>A: 150 mg q12h<br>B: 300 mg q12h                                   | Postoperative or posttraumatic surgical patients in the ICU<br><br>NG tubes clamped for 1 h after administration          | 18<br>A: 10<br>B: 8                                                                                            | A: 60<br>B: 50        | A: 44.6 ± 18.2<br>B: 51.9 ± 21.6        | NR    | NR  | Mean serum concentration (ng/mL)<br><br>T = 2 h<br>A: 298.02 ± 198.69<br>B: 639.84 ± 282.92<br><br>T = 6 h<br>A: 221.09 ± 164.43<br>B: 473.90 ± 259.31<br><br>T = 12 h<br>A: 98.68 ± 68.31<br>B: 316.66 ± 28.72 | <ul style="list-style-type: none"> <li>• Tube feeds held after drug administration</li> </ul> | <ul style="list-style-type: none"> <li>• Enteral administration of ranitidine led to effective absorption in ICU patients</li> <li>• Both doses provided serum concentrations high enough to suppress gastric acid production</li> </ul>                                                                                                                                                                |
| <b>Other Medications</b>              |                             |                                                                                                     |                                                                                                                           |                                                                                                                |                       |                                         |       |     |                                                                                                                                                                                                                 |                                                                                               |                                                                                                                                                                                                                                                                                                                                                                                                         |
| DeCarolis et al. <sup>12</sup> , 2016 | Retrospective Observational | Potassium chloride<br><br>Mean IV Dose: 30.5 ± 14.7 mmol<br><br>Mean Enteral Dose: 35.5 ± 18.8 mmol | All patients in ICU and SICU receiving the study drug between Dec 2007 and Apr 2008<br><br>Max 5 unique doses per patient | 142 patients<br>16 got IV and enteral<br><br>IV: 109 Patients, 212 Doses<br><br>Enteral: 49 patients, 66 Doses | IV: 99<br>Enteral: 94 | IV: 66.9 ± 12.9<br>Enteral: 64.2 ± 11.2 | NR    | NR  | Change in plasma potassium (mmol/L)<br><br>IV: 0.25 (0.16 to 0.33)<br><br>Enteral: 0.27 (0.15 to 9.39)                                                                                                          | <ul style="list-style-type: none"> <li>• Not discussed</li> </ul>                             | <ul style="list-style-type: none"> <li>• No difference in mean dose response after IV or enteral administration was observed</li> <li>• Overall success of reaching the minimum potassium concentration defined by each protocol was 61% for IV and 59% for enteral administration</li> <li>• Using IV over enteral route for potassium administration did not appear to offer any advantage</li> </ul> |

| Author, year                          | Study type                 | Drug and dose                                                                                             | Study population                                                                                                                                                          | N                    | Sex (% Male)   | Age (years)              | F (%)    | AUC                                                                                                    | C                                                                                                          | Factors altering drug absorption | Main findings and clinical considerations                                                                                                                                                   |
|---------------------------------------|----------------------------|-----------------------------------------------------------------------------------------------------------|---------------------------------------------------------------------------------------------------------------------------------------------------------------------------|----------------------|----------------|--------------------------|----------|--------------------------------------------------------------------------------------------------------|------------------------------------------------------------------------------------------------------------|----------------------------------|---------------------------------------------------------------------------------------------------------------------------------------------------------------------------------------------|
| Murray et al. <sup>13</sup> , 1998    | Prospective Interventional | Tacrolimus<br><br>All patients received study drug with both regimens<br><br>Doses ranged from 1-8 mg BID | Transplant patients at least 7 days after surgery<br><br>Regimens:<br>A: TF held 1 hr prior to and 8 hr after drug administration<br><br>B: Continuous TF                 | 10                   | 60             | Mean 53 (29-67)          | NR       | Dose-normalized AUC (ng/mL/h/mg)<br><br>A: 26.8 ± 10.7<br><br>B: 25.2 ± 12.3                           | C <sub>min</sub> (ng/mL)<br>A: 1-13.0<br>B: 5-12<br><br>C <sub>max</sub> (ng/mL)<br>A: 5-46<br>B: 5.2-36.3 | • Possible interaction with TF   | • Participants received Osmolite®<br>• Administration of tacrolimus with TF did not appear to interfere with drug absorption                                                                |
| Shalansky et al. <sup>14</sup> , 1992 | Prospective Interventional | Aminophylline<br><br>Dose: to target serum concentration 10-20 mg/L                                       | Critically ill, mechanically ventilated patients<br><br>Phase 1: IV aminophylline<br><br>Phase 2: Aminophylline liquid through NG or gastronomy tube<br><br>Continuous TF | 8                    | 38             | Mean 63 (57-69)          | 103 ± 22 | AUC <sub>0-8</sub> (units not provided) range<br><br>IV: 67.37-117.79<br><br>NG: 66.87-120.15          | Mean serum concentration range (mg/L)<br><br>IV: 8.4-14/7<br>8.3-14.7<br>NG:                               | • Possible interaction with TF   | • Near 100% oral bioavailability was observed<br>• No reduction in absorption was observed with coadministration of aminophylline and the feed formulas (Isocan®, Osmolite®, and Magnacal®) |
| Sharpe et al. <sup>15</sup> , 2013    | Prospective Interventional | Thyroxine 2 µg/kg PO or IV<br><br>All patients received a PO and IV drug, one of which was placebo        | Solid organ donors in the ICU<br><br>A: Thyroxine PO<br><br>B: Thyroxine IV                                                                                               | 32<br>A: 15<br>B: 17 | A: 87<br>B: 47 | A: 61 ± 14<br>B: 53 ± 17 | 91-93    | AUC Average (pmol*hr/L)<br><br>A: 86.1<br>B: 92.2<br><br>Difference: 6.1, 95% CI -11.9 to 24.1, P=0.52 | NR                                                                                                         | • Not discussed                  | • It appears that thyroxine is well absorbed in organ donors in the ICU                                                                                                                     |

ECMO: extracorporeal membrane oxygenation support; AUC, area under curve; BMT, bone marrow transplant; C, concentration; F; bioavailability; IV, intravenous; N, number of participants in the study; NICU, Neonatal Intensive Care Unit; NR, not reported, PICU, Pediatric Intensive Care Unit; PK, pharmacokinetics; PO; per oral.

Supplementary Table 2 references:

1. Rebeck JA, Fish DN, Abraham E. Pharmacokinetics of intravenous and oral levofloxacin in critically ill adults in a medical intensive care unit. *Pharmacotherapy*. Oct 2002;22(10):1216-1225.
2. Kanji S, McKinnon PS, Barletta JF, et al. Bioavailability of gatifloxacin by gastric tube administration with and without concomitant enteral feeding in critically ill patients. *Crit Care Med*. May 2003;31(5):1347-1352.
3. Chin TW, Vandenbroucke A, Fong IW. Pharmacokinetics of trimethoprim-sulfamethoxazole in critically ill and non-critically ill AIDS patients. *Antimicrob Agents Chemother*. Jan 1995;39(1):28-33.
4. Buijk SL, Gysens IC, Mouton JW, et al. Pharmacokinetics of sequential intravenous and enteral fluconazole in critically ill surgical patients with invasive mycoses and compromised gastro-intestinal function. *Intensive Care Med*. Jan 2001;27(1):115-121.
5. Nicolau DP, Crowe H, Nightingale CH, et al. Bioavailability of fluconazole administered via a feeding tube in intensive care unit patients. *J Antimicrob Chemother*. Aug 1995;36(2):395-401.
6. Pelz RK, Lipsett PA, Swoboda SM, et al. Enteral fluconazole is well absorbed in critically ill surgical patients. *Surgery*. 2002;131(5):534-540.
7. Karoubi P, Huang C, Rabbat A, et al. Pharmacokinetics and absolute bioavailability of voriconazole administered through a nasogastric tube with continuous enteral feeding to critically ill ventilated patients. *Annals of Intensive Care*. 2016;6(SUPPL. 1).
8. Mulla H, Peek GJ, Harvey C, et al. Oseltamivir pharmacokinetics in critically ill adults receiving extracorporeal membrane oxygenation support. *Anaesth Intensive Care*. Jan 2013;41(1):66-73.
9. Taylor WR, Thinh BN, Anh GT, et al. Oseltamivir is adequately absorbed following nasogastric administration to adult patients with severe H5N1 influenza. *PLoS One*. 2008;3(10):e3410.

10. Tomlin M, Skinner B, Fennell J, et al. Oseltamivir dosing with haemofiltration. *Critical Care*. 2010;14(SUPPL. 1):S25-S25.
11. Pemberton LB, Schaefer N, Goehring L, et al. Oral ranitidine as prophylaxis for gastric stress ulcers in intensive care unit patients: serum concentrations and cost comparisons. *Crit Care Med*. 1993;21(3):339-342.
12. DeCarolis D, Kim G, Rector T, et al. Comparative dose response using the intravenous versus enteral route of administration for potassium replenishment. *Intensive & critical care nursing*. 2016;36:17-23.
13. Murray M, Grogan TA, Lever J, et al. Comparison of tacrolimus absorption in transplant patients receiving continuous versus interrupted enteral nutritional feeding. *Ann Pharmacother*. Jun 1998;32(6):633-636.
14. Shalansky KF, Vaughan LM, Ustad C, et al. Absolute bioavailability of aminophylline liquid administered enterally in adults requiring mechanical ventilation. *Clin Pharm*. May 1992;11(5):428-432.
15. Sharpe MD, van Rassel B, Haddara W. Oral and intravenous thyroxine (T4) achieve comparable serum levels for hormonal resuscitation protocol in organ donors: a randomized double-blinded study. *Can J Anaesth*. Oct 2013;60(10):998-1002.

### Bioavailability of Orally Administered Drugs in Critically Ill Patients

**Supplementary Table 3.** Summarizing table of all articles discussing altered drug absorption in pediatrics.

| Author, year | Study type | Drug and dose | Study population | N | Sex (% Male) | Age (years) | F (%) | AUC | C | Factors altering drug absorption | Clinical implications |
|--------------|------------|---------------|------------------|---|--------------|-------------|-------|-----|---|----------------------------------|-----------------------|
|--------------|------------|---------------|------------------|---|--------------|-------------|-------|-----|---|----------------------------------|-----------------------|

| Author, year                                   | Study type                  | Drug and dose                                                                                                      | Study population                                                                                                                                                                                                                        | N   | Sex (% Male) | Age (years)                                                        | F (%)      | AUC | C                                                                                                                        | Factors altering drug absorption                                                                                                                                                                                 | Clinical implications                                                                                                                                                                                                                                      |
|------------------------------------------------|-----------------------------|--------------------------------------------------------------------------------------------------------------------|-----------------------------------------------------------------------------------------------------------------------------------------------------------------------------------------------------------------------------------------|-----|--------------|--------------------------------------------------------------------|------------|-----|--------------------------------------------------------------------------------------------------------------------------|------------------------------------------------------------------------------------------------------------------------------------------------------------------------------------------------------------------|------------------------------------------------------------------------------------------------------------------------------------------------------------------------------------------------------------------------------------------------------------|
| Arenas-Lopez et al. <sup>1</sup> , 2014        | Prospective observational   | Clonidine<br>3 µg/kg, single dose                                                                                  | A population PK-model was conducted on post-cardiac surgical patients at the PICU comparing results to healthy patients from another study<br><br>Drug administration via NG                                                            | 16  | NR           | 6.7 months (5.9-8.6)                                               | NR         | NR  | C <sub>max</sub> (ng/ml)<br><br>0.73 (0.15-1.55) with T <sub>max</sub> (min)<br>190 (12-478)                             | <ul style="list-style-type: none"> <li>Reduced splenic blood flow due to cardiac surgery</li> <li>Clonidine solution was not diluted</li> </ul>                                                                  | <ul style="list-style-type: none"> <li>The majority reached therapeutic drug concentrations</li> <li>Slow absorption rate. T<sub>max</sub> in healthy subjects: 63 min</li> <li>High inter-individual variability in C<sub>max</sub></li> </ul>            |
| Kleiber et al. <sup>2</sup> , 2019             | Prospective observational   | Acetaminophen<br>15 mg/kg IV q6h<br><br>Single dose microtracer [ <sup>14</sup> C]<br>Acetaminophen at 3 ng/kg     | A populations PK-model on patients managed at PICU [ <sup>14</sup> C]-marked drug<br><br>Enteral dose given concurrently with IV dose                                                                                                   | 47  | 80.9         | 6.1 months (1.8-20)                                                | 72 (11-91) | NR  | C <sub>ss</sub> (mg/L):<br>PO: 6.5<br><br>IV: 10                                                                         | <ul style="list-style-type: none"> <li>Use of opioids</li> </ul>                                                                                                                                                 | <ul style="list-style-type: none"> <li>C<sub>ss</sub> subtherapeutic after PO</li> <li>C<sub>ss</sub> extrapolated from data from single dose of enteral microtracer acetaminophen</li> <li>Risk of therapy failure with enteral administration</li> </ul> |
| Marsot et al. <sup>3</sup> , 2014              | Retrospective observational | Phenobarbital<br>IV or PO: 10-20 mg/kg loading dose, followed by 5 mg/kg                                           | A population PK-model was conducted on patients managed at the NICU<br>Data collection for both IV and PO administration<br>Average weight was between 0.7-10 kg                                                                        | 48  | 60           | Gestational (week):<br>37.1 ± 3.3<br>Postnatal (days): 26.8 ± 64.0 | 48.9       | NR  | Random (mg/L):<br><br>PO: 23.2 ± 10.4<br><br>IV: 27.1 ± 9.4                                                              | <ul style="list-style-type: none"> <li>Phenobarbital is a weak acid. The gastric pH is higher in neonates compared with adults</li> </ul>                                                                        | <ul style="list-style-type: none"> <li>TDM is necessary in this population</li> <li>May need high loading and maintenance doses for oral administration</li> </ul>                                                                                         |
| Williams et al. <sup>4</sup> , 2019 (abstract) | Retrospective observational | Phenobarbital<br><br>Dose: NR                                                                                      | A population PK-model was conducted on patients managed at the NICU                                                                                                                                                                     | 112 | NR           | NR                                                                 | 85         | NR  | NR                                                                                                                       | NR                                                                                                                                                                                                               | <ul style="list-style-type: none"> <li>Higher bioavailability than previously reported, but still lower than implied (100%)</li> </ul>                                                                                                                     |
| Matthias et al. <sup>5</sup> , 2012            | Case report                 | Posaconazole<br>Day 55-60: 100 mg TID increased to 600 mg q6h<br>Day 61-174: 400 mg q4h<br>Day 175-387: 800 mg q6h | Case 1<br>Patient, 19.1 kg, suffered from leukemia and had undergone a BMT<br>Day 55-60: NG<br>Day 61-174: NG<br>Day 175-387: PO<br>Day 175-230: bolus feeding with drug administration<br>Day 52-225: concomitant parenteral nutrition | 1   | 100          | 10                                                                 | NR         | NR  | Random (µg/ml):<br>Day 55-60: <0.15<br>Day 61-174: NR<br>Day 175-229: 0.32-0.78<br>Day 230-387: <0.3, often undetectable | <ul style="list-style-type: none"> <li>Interaction with PPI</li> <li>Interactions with other drugs</li> <li>Interactions with the TF formula</li> <li>Inconsistent rate of enteral nutrition (case 2)</li> </ul> | <ul style="list-style-type: none"> <li>Both patients received higher doses than recommended without significant adverse effects</li> <li>Both cases experienced subtherapeutic serum posaconazole concentrations</li> </ul>                                |

| Author, year                     | Study type                | Drug and dose                                                                                                   | Study population                                                                                                                                                                                                                                                                                                                                                      | N | Sex (% Male) | Age (years)  | F (%) | AUC | C                                                                                                                       | Factors altering drug absorption                                                                                                                                                            | Clinical implications                                                                                                                                                                                                                                                                                                                                                                                                                                                                                                                                         |
|----------------------------------|---------------------------|-----------------------------------------------------------------------------------------------------------------|-----------------------------------------------------------------------------------------------------------------------------------------------------------------------------------------------------------------------------------------------------------------------------------------------------------------------------------------------------------------------|---|--------------|--------------|-------|-----|-------------------------------------------------------------------------------------------------------------------------|---------------------------------------------------------------------------------------------------------------------------------------------------------------------------------------------|---------------------------------------------------------------------------------------------------------------------------------------------------------------------------------------------------------------------------------------------------------------------------------------------------------------------------------------------------------------------------------------------------------------------------------------------------------------------------------------------------------------------------------------------------------------|
|                                  |                           |                                                                                                                 | Day 231-387: continuous TF PPI prophylaxis treatment                                                                                                                                                                                                                                                                                                                  |   |              |              |       |     |                                                                                                                         |                                                                                                                                                                                             |                                                                                                                                                                                                                                                                                                                                                                                                                                                                                                                                                               |
|                                  |                           | Posaconazole<br>Day 46-59: 120-300 mg/kg/day divided q4h<br>Day 60-100: 3000 mg/day<br>Day 101-134: 1500 mg/day | Case 2<br>BMT patient, 11.6 kg, with a history of seizures and leukemia<br>Day 46-59: jejunostomy tube. TF held for two h after drug administration<br>Day 60-134: jejunostomy tube. Continuous oral infusion<br>Day 135: discontinued therapy<br>Day 1-156: enteral nutrition<br>Day 1-66, 91-108 and 135-156: parenteral nutrition<br><br>PPI prophylaxis treatment | 1 | 100          | 19 months    | NR    | NR  | Random (µg/ml):<br>Day 46-59: <0.20<br>Day 60-100: 0.36-0.85<br>Day 101-134: 0.2                                        |                                                                                                                                                                                             |                                                                                                                                                                                                                                                                                                                                                                                                                                                                                                                                                               |
| Miles et al. <sup>6</sup> , 1990 | Prospective Observational | Carbamazepine<br><br><12y: 10 mg/kg loading dose<br><br>≥12y: 8 mg/kg loading dose                              | PICU patients with frequent seizures<br><br>Doses given through feeding tube<br><br>1 patient received enteral feeds                                                                                                                                                                                                                                                  | 6 | 67           | 5 (0.2-13.9) |       |     | Mean C (mg/L), excluding patient with ileus<br><br>1 h after dose: 4.3<br><br>2 h after dose: 7.3<br><br>8 h after: 6.2 | <ul style="list-style-type: none"> <li>• Ileus (one patient did not reach therapeutic concentrations because of it)</li> <li>• Delayed gastric emptying</li> <li>• Enteral feeds</li> </ul> | <ul style="list-style-type: none"> <li>• All patients excluding one with an ileus had therapeutic concentrations 2 hours after loading dose administration</li> <li>• 4 patients had therapeutic concentrations at 1 hour and 6 hours after loading dose administration</li> <li>• Enteral feeds in one patient appeared to delay, but not reduce, absorption.</li> <li>• Enteral carbamazepine in this population appears appropriate without dosage adjustment.</li> <li>• Avoiding enteral feeds may be appropriate if rapid effect is required</li> </ul> |

AUC, area under curve; BMT, bone marrow transplant; C, concentration; F; bioavailability; IV, intravenous; N, number of participants in the study; NICU, Neonatal Intensive Care Unit; NR, not reported, PICU, Pediatric Intensive Care Unit; PK, pharmacokinetics; PO; per oral.

### Supplementary Table 3 References

1. Arenas-Lopez S, Mulla H, Manna S, et al. Enteral absorption and haemodynamic response of clonidine in infants post-cardiac surgery. *Br J Anaesth*. Dec 2014;113(6):964-969.
2. Kleiber N, Calvier E, Mooij MG, et al. Enteral Acetaminophen Bioavailability in Pediatric Intensive Care Patients Determined With an Oral Microtracer and Pharmacokinetic Modeling to Optimize Dosing. *Crit Care Med*. Dec 2019;47(12):e975-e983.
3. Marsot A, Brevaut-Malaty V, Vialet R, et al. Pharmacokinetics and absolute bioavailability of phenobarbital in neonates and young infants, a population pharmacokinetic modelling approach. *Fundam Clin Pharmacol*. Aug 2014;28(4):465-471.
4. Williams A, Donovan T, Charles B. Characterising the pharmacokinetics of phenobarbitone in neonates to facilitate future individualised dosing. *Archives of Disease in Childhood*. 2019;104(6).
5. K.R MD, D.E N, C.A P. Poor absorption of high-dose posaconazole in pediatric bone marrow transplant patients. *Annals of Pharmacotherapy*. 2012;46(9):e22-e22.
6. Miles MV, Lawless ST, Tennison MB, et al. Rapid loading of critically ill patients with carbamazepine suspension. *Pediatrics*. Aug 1990;86(2):263-266.
